# Supplementary material for: Pseudotetrahedral Zn(ii)-(R or S)-dihalogen-salicylaldiminato complexes with Λ- or Δ-chirality induction at-metal
Source: Royal Society of Chemistry journal article supplement (doi:10.1039/d1dt04220c), 2021-12-28
Supplement: d1dt04220c1.pdf [file d1dt04220c1.pdf]

## Electronic supplementary information (ESI)

### **Pseudotetrahedral Zn(II)-(*R* or *S*)-dihalogen-salicylaldiminato complexes with $\Lambda$ - or $\Delta$ -chirality induction at-metal**

Hadi Amiri Rudbari,<sup>a,\*</sup> Arezoo Saadati,<sup>a</sup> Mahnaz Aryaeifar,<sup>a</sup> Olivier Blacque,<sup>b</sup> Isabel Correia,<sup>c</sup> Mohammad Khairul Islam,<sup>d</sup> Dennis Woschko,<sup>e</sup> Christoph Janiak,<sup>e,\*</sup> and Mohammed Enamullah<sup>d,\*</sup>

<sup>a</sup> Department of Chemistry, University of Isfahan, Isfahan 81746-73441, Iran.

<sup>b</sup> Department of Chemistry, University of Zurich, Winterthurerstrasse 190, CH-8057, Zurich, Switzerland.

<sup>c</sup> Centro de Química Estrutural, Instituto Superior Técnico, Universidade de Lisboa, Av Rovisco Pais, 1049-001 Lisboa, Portugal.

<sup>d</sup> Department of Chemistry, Jahangirnagar University, Dhaka1342, Bangladesh.

<sup>e</sup> Institut für Anorganische Chemie und Strukturchemie, Universität Düsseldorf, Universitätsstr. 1, D-40225 Düsseldorf, Germany.

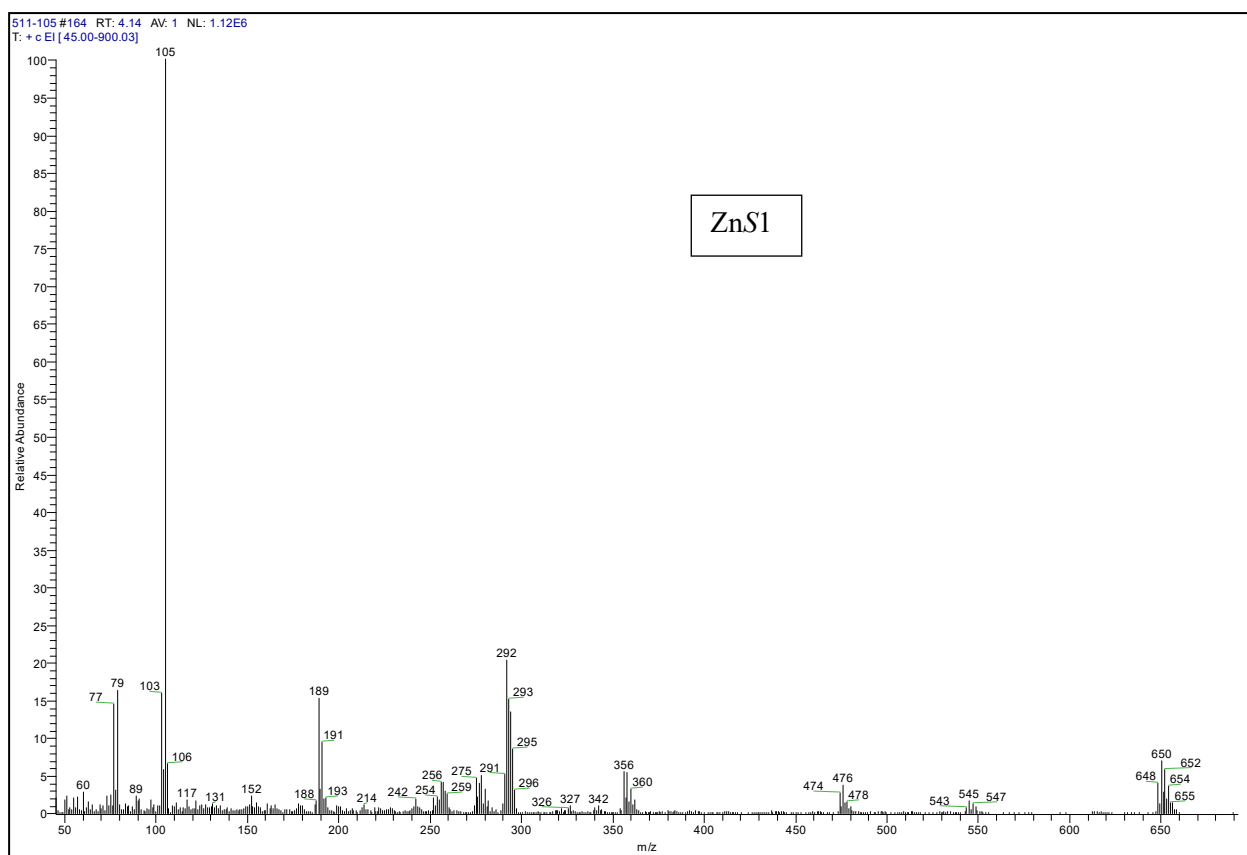

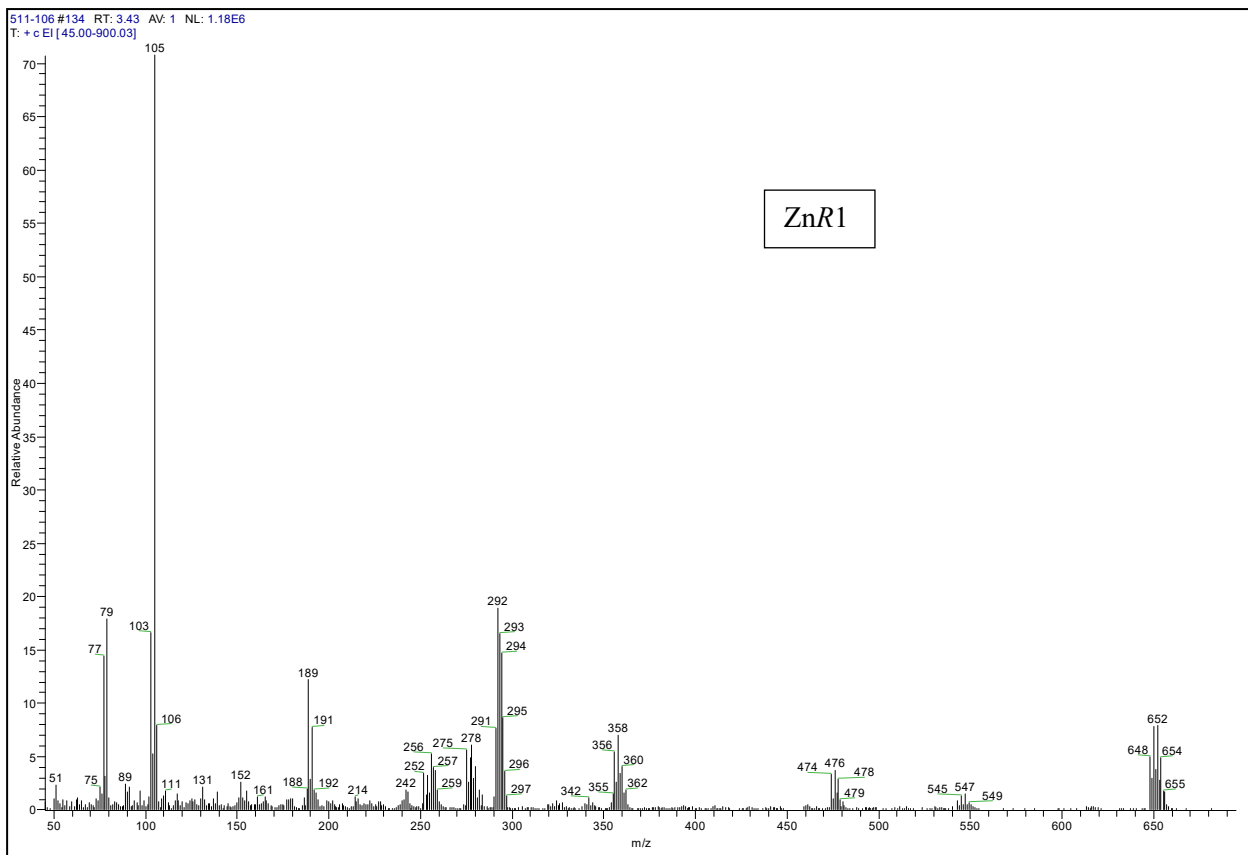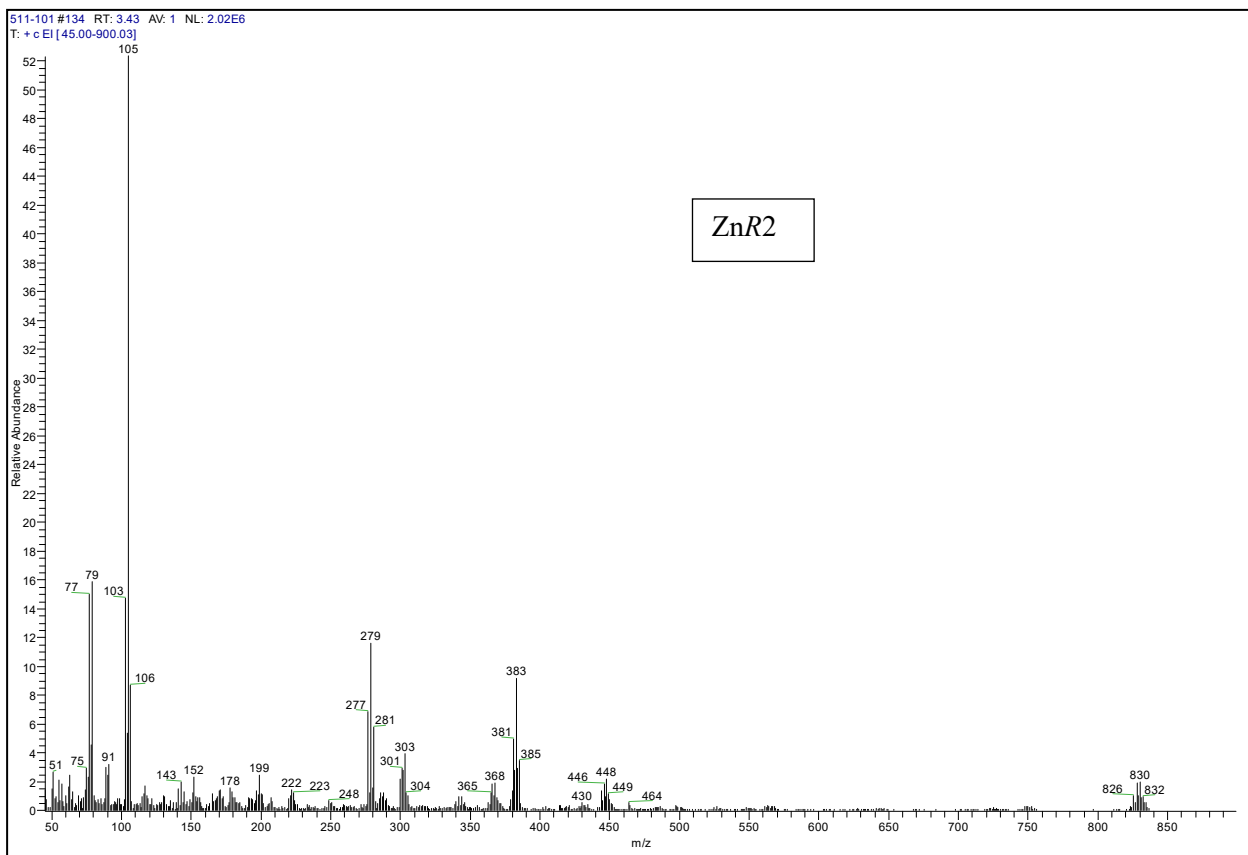

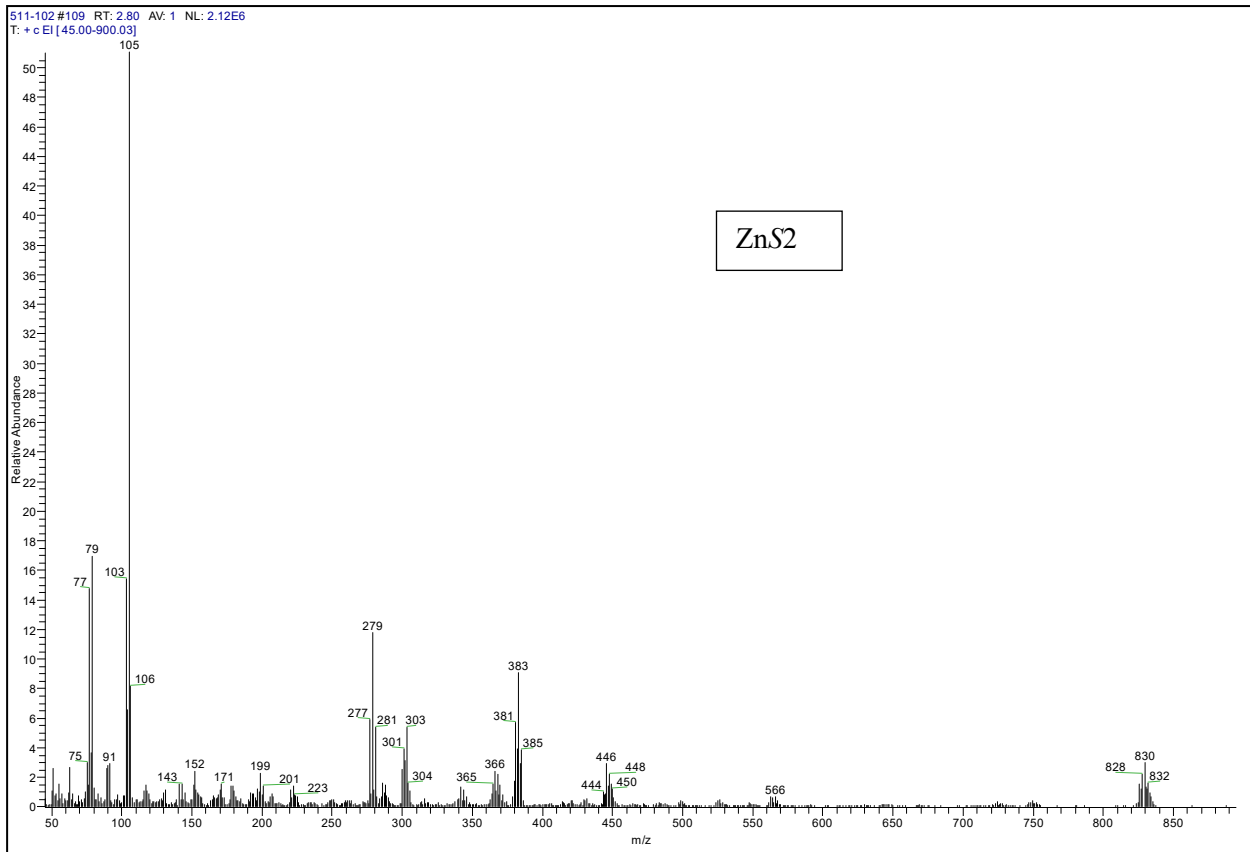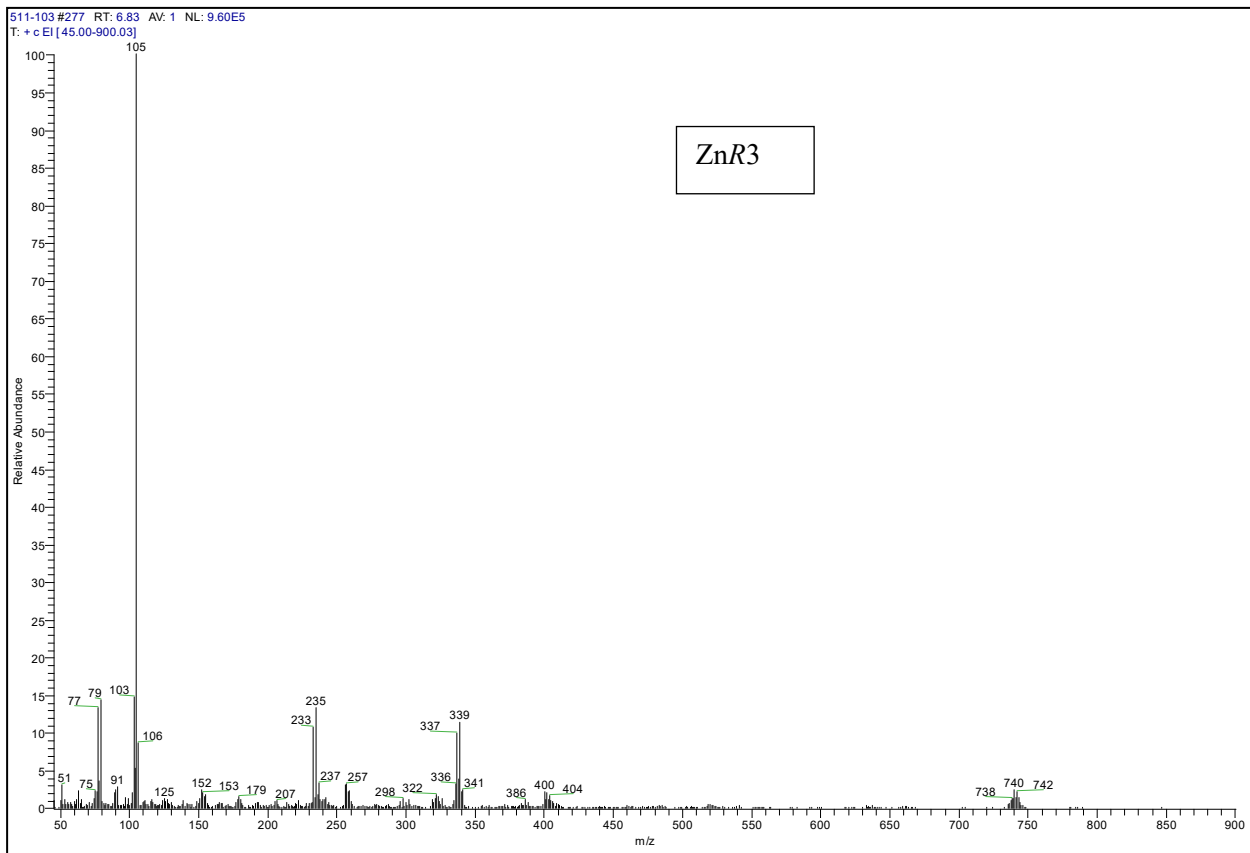

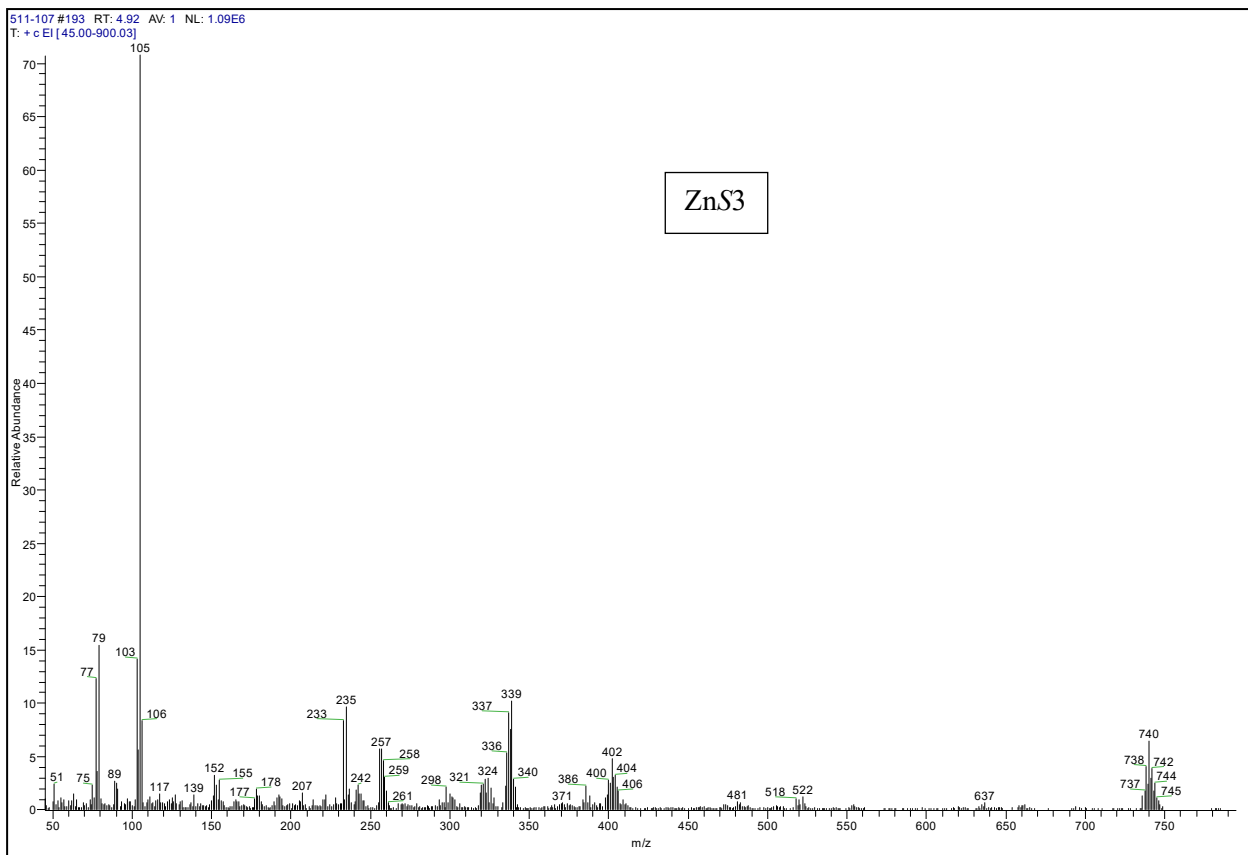

**Fig. S1** EI-mass spectra for ZnR1-3 and ZnS1-3 complexes.

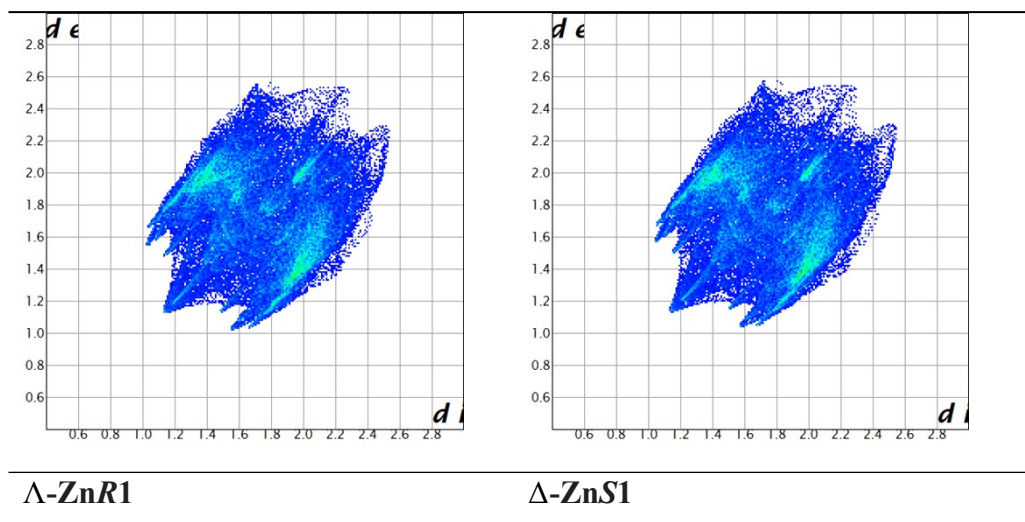

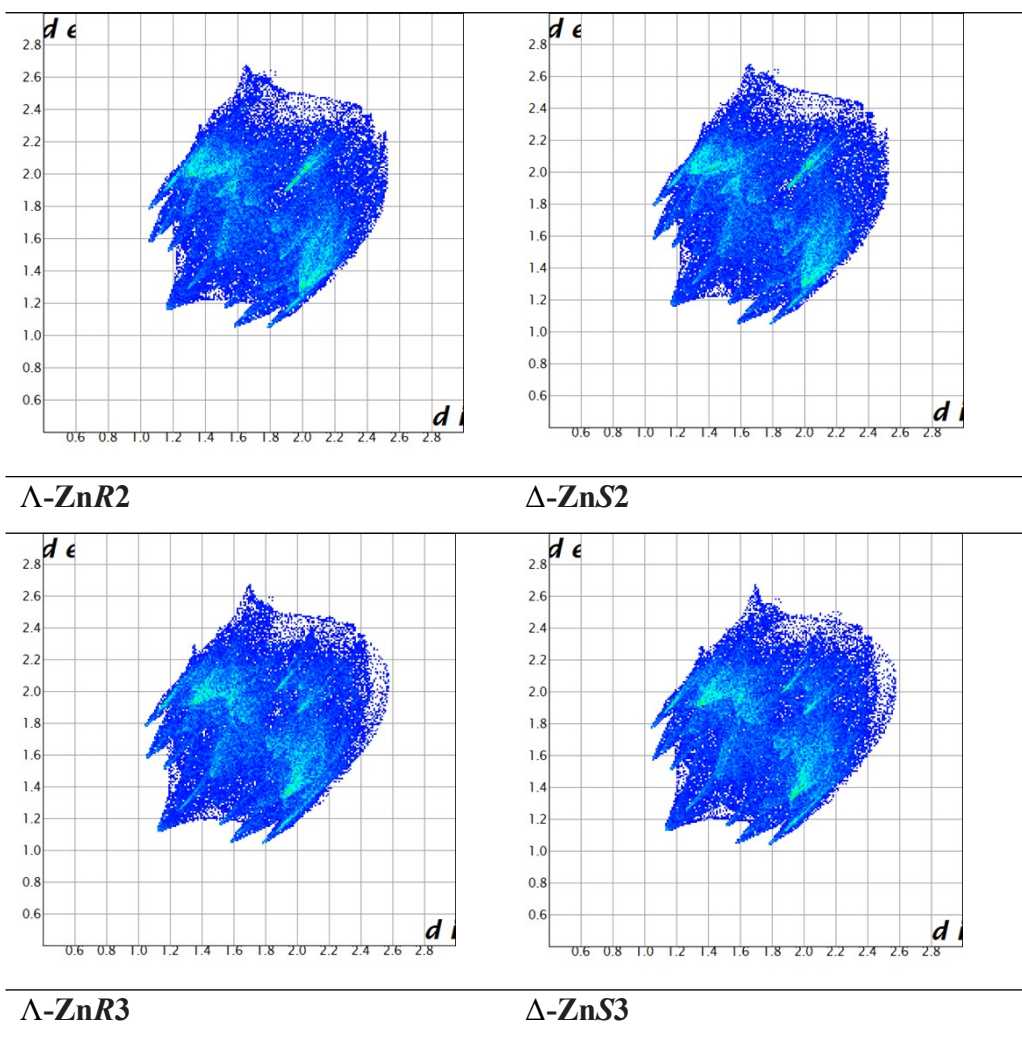

Fig. S2 Two-dimensional fingerprint plots for the Zn(II)-complexes.

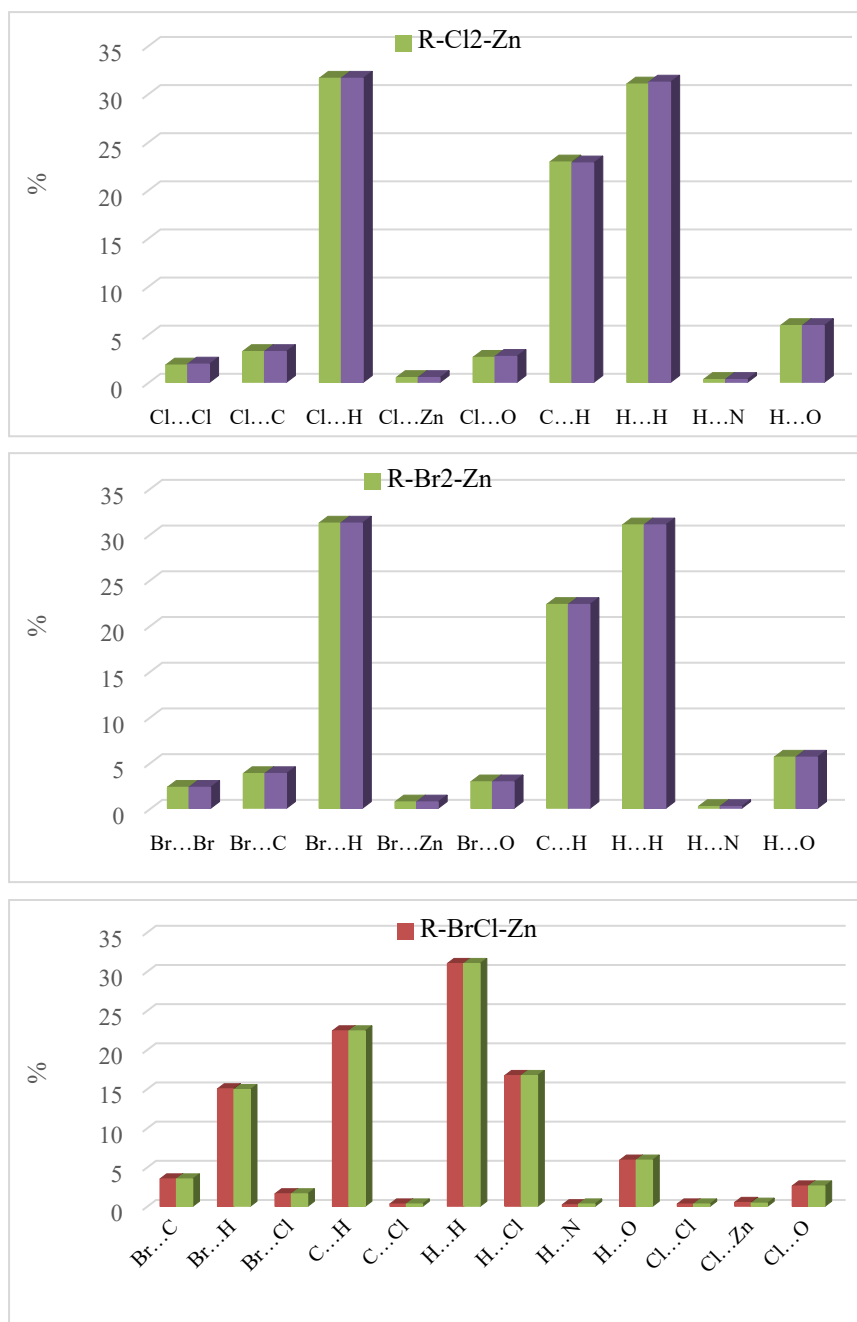

**Fig. S3** Relative contributions to the Hirshfeld surfaces area for different intermolecular contacts in Zn(II)-complexes.

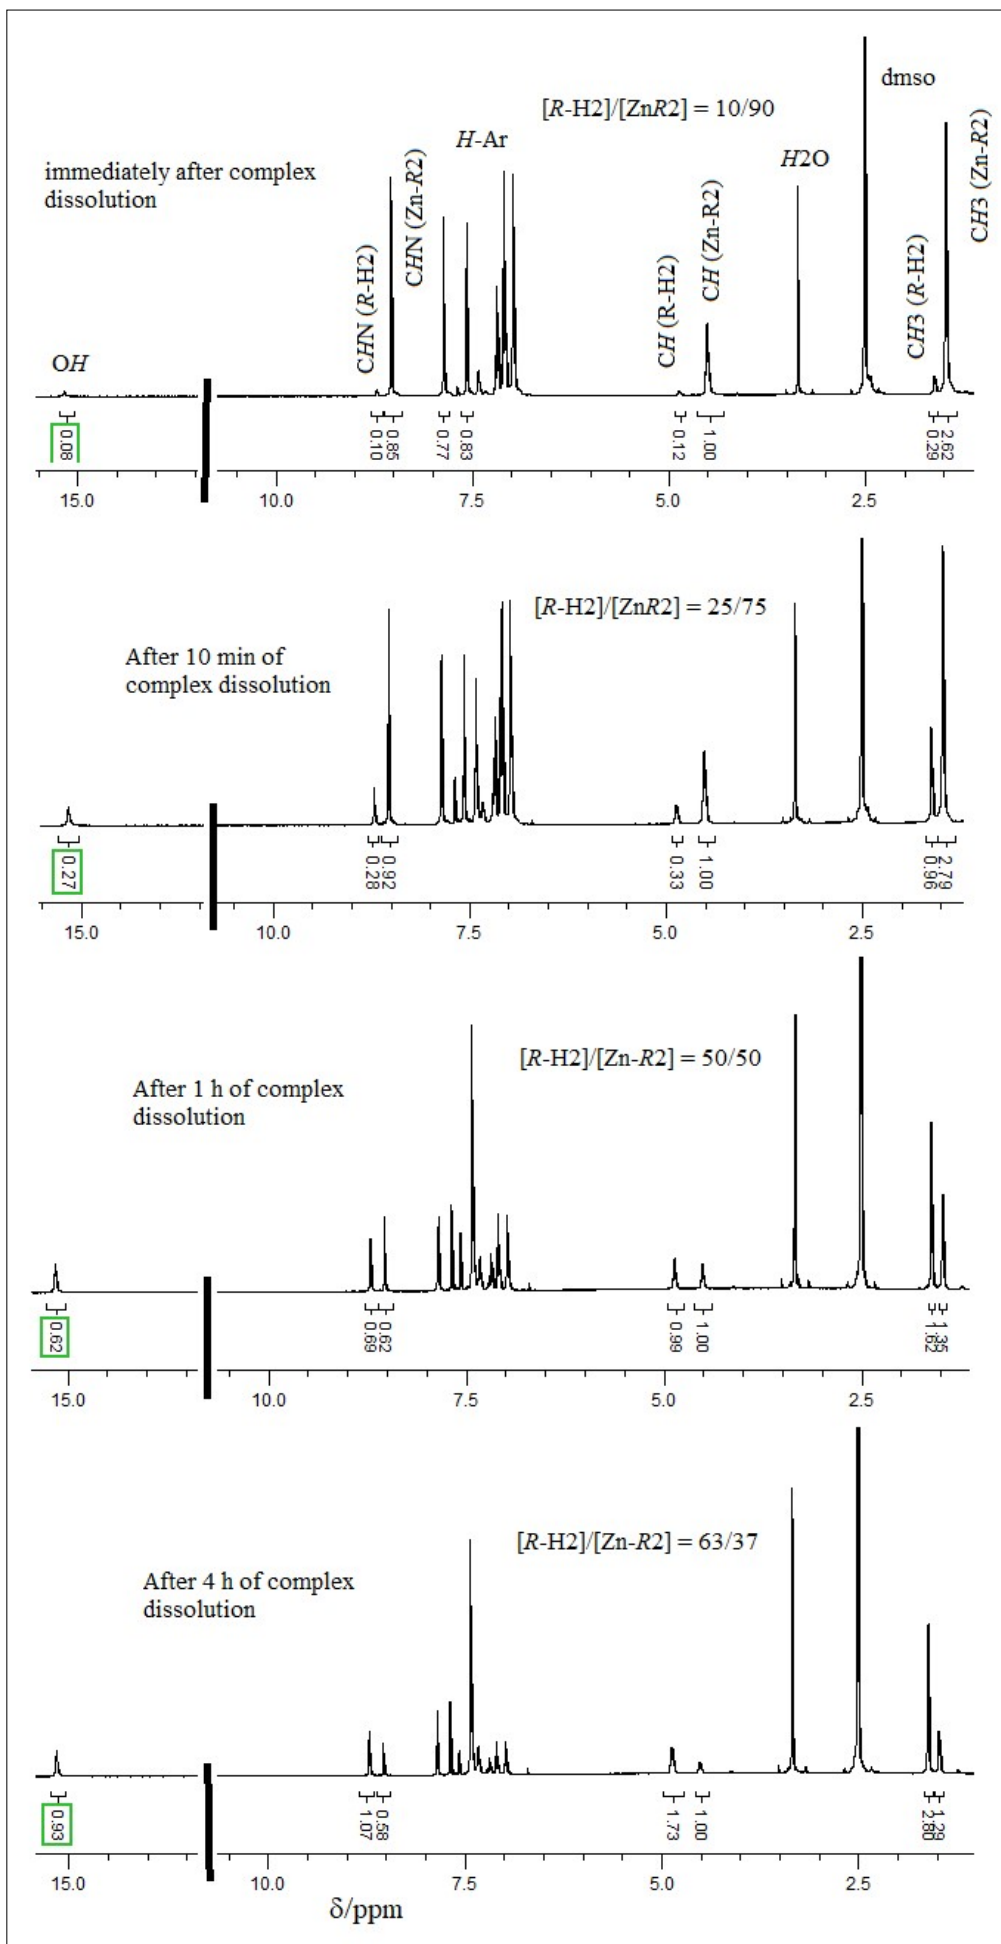

**Fig. S4**  $^1\text{H}$  NMR (400 MHz) spectra for  $\text{ZnR2}$  with small amounts of extra free Schiff base ( $R\text{-H2}$ ) in  $\text{dms}\text{-d}_6$  at  $25\text{ }^\circ\text{C}$  at different time intervals of complex dissolution (single peak corresponds to  $\Lambda\text{-ZnR2}$  diastereomer).

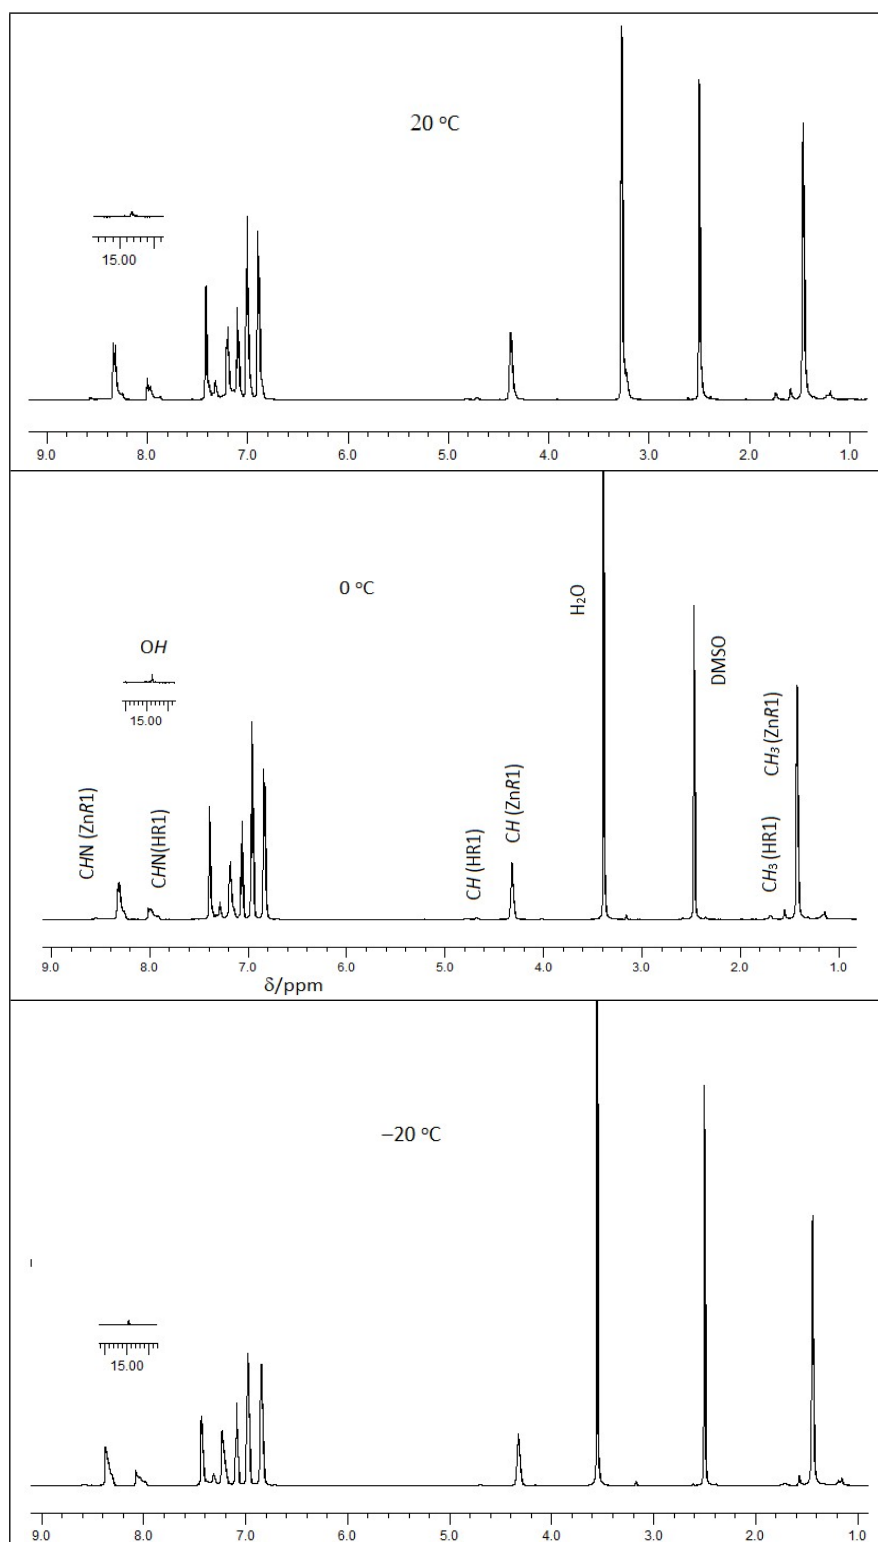



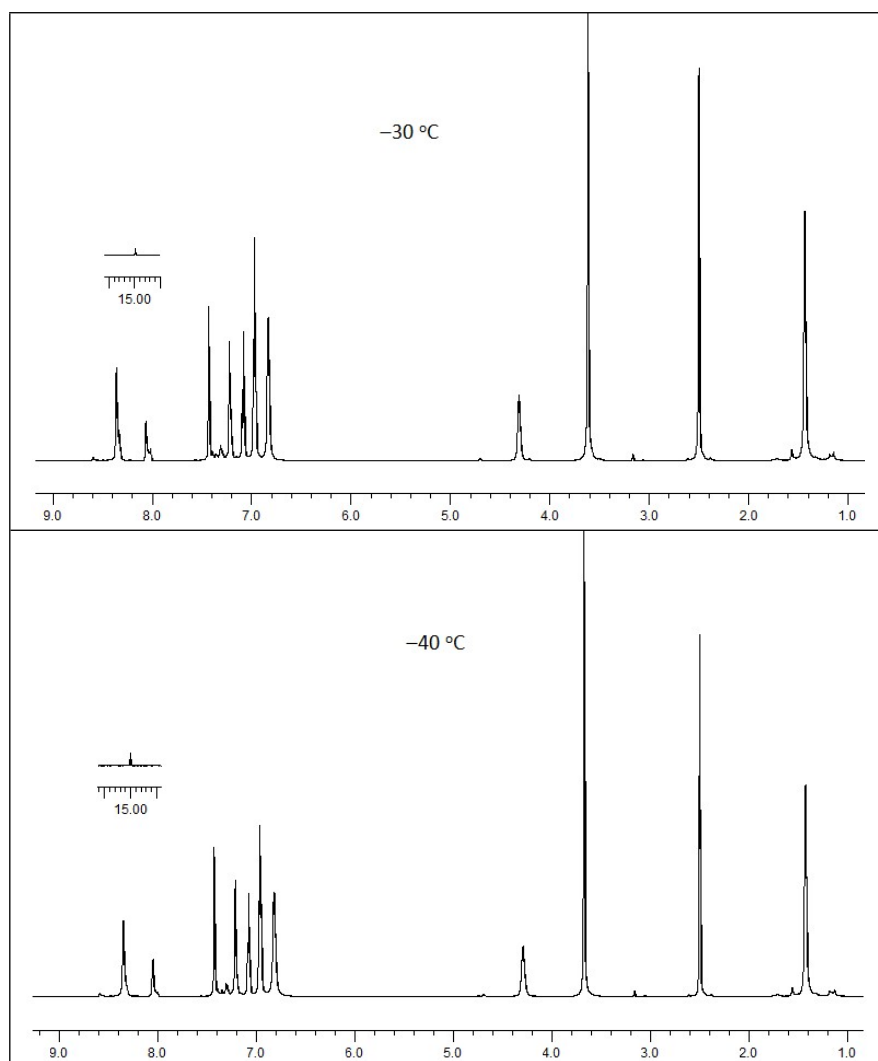

**Fig. S5** <sup>1</sup>H NMR (400 MHz) spectra for ZnR1 at variable temperature (20, 0, -20, -30 and -40 °C) in dms<sub>o</sub>-d<sub>6</sub>/CDCl<sub>3</sub> (50%, v/v) (single peak corresponds to Λ-ZnR1 diastereomer). Very weak peaks correspond to the Schiff base (<3.0 %), resulting from hydrolysis of the complex with time.

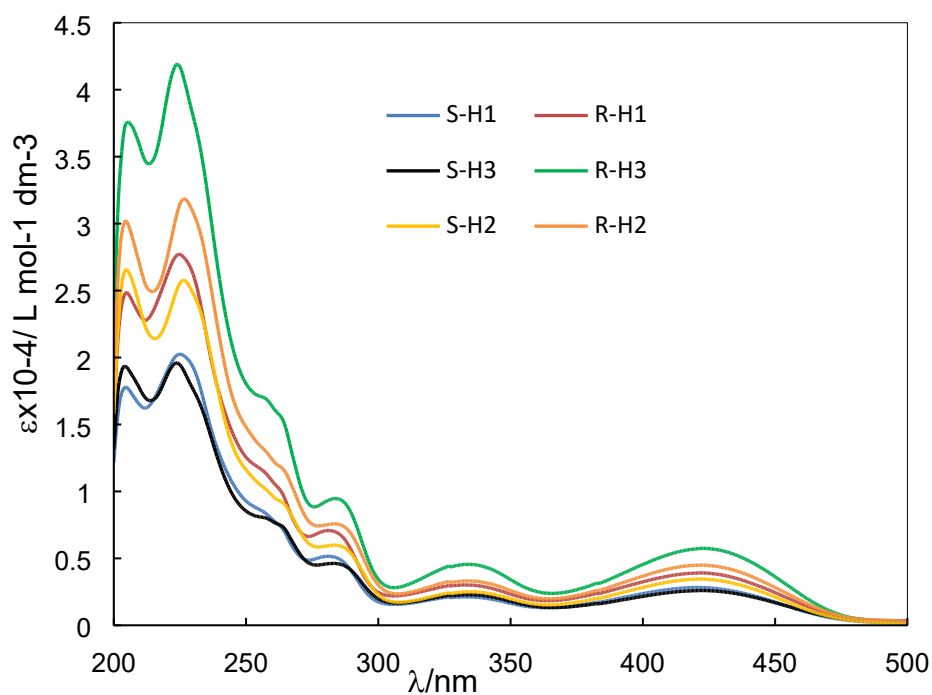

**Fig. S6** UV-Vis. spectra for the enantiopure Schiff bases *R*-H1 ( $3.24 \times 10^{-2}$  mM), *S*-H1 ( $3.24 \times 10^{-2}$  mM), *R*-H2 ( $2.45 \times 10^{-2}$  mM), *S*-H2 ( $3.09 \times 10^{-2}$  mM), *R*-H3 ( $2.79 \times 10^{-2}$  mM) and *S*-H3 ( $3.10 \times 10^{-2}$  mM) in methanol at 25 °C.

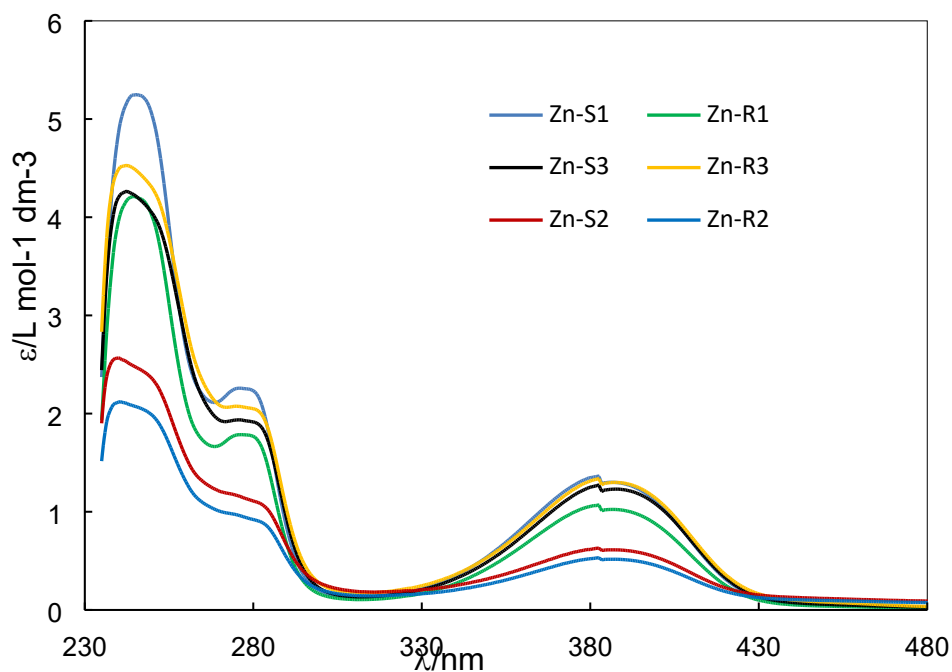

**Fig. S7** UV-Vis. spectra for the enantiopure ZnR1 ( $3.89 \times 10^{-2}$  mM), ZnS1 ( $3.22 \times 10^{-2}$  mM), ZnR2 ( $2.60 \times 10^{-2}$  mM), ZnS2 ( $1.58 \times 10^{-2}$  mM), ZnR3 ( $2.16 \times 10^{-2}$  mM) and ZnS3 ( $2.97 \times 10^{-2}$  mM) in methanol/chloroform (50%, v/v) at 25 °C.

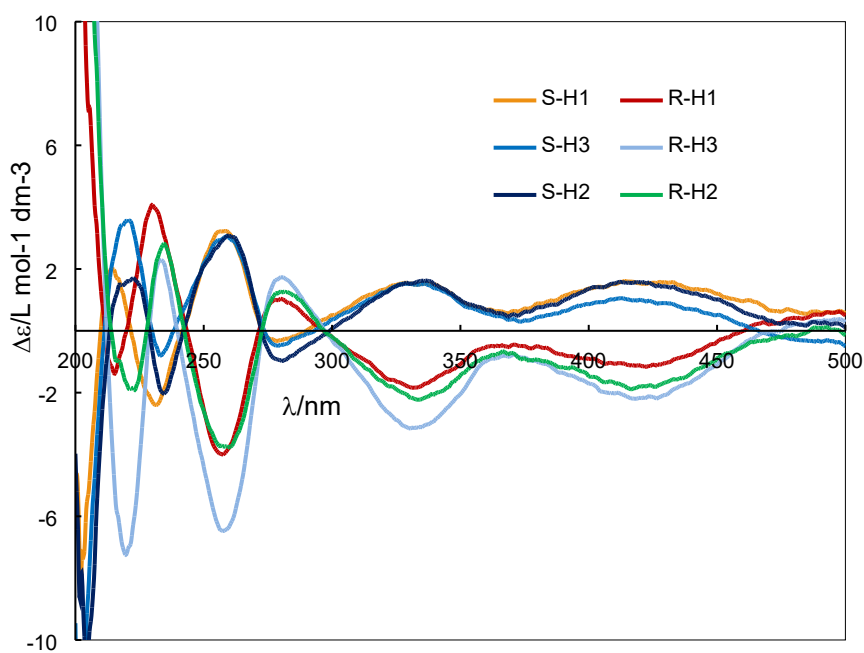

**Fig. S8** Electronic circular dichroism (ECD) spectra for enantiomeric pairs of the Schiff bases *R*-H1/*S*-H1, *R*-H2/*S*-H2 and *R*-H3/*S*-H3 (ca.  $3.00 \times 10^{-2}$  mM) in methanol at 25 °C.

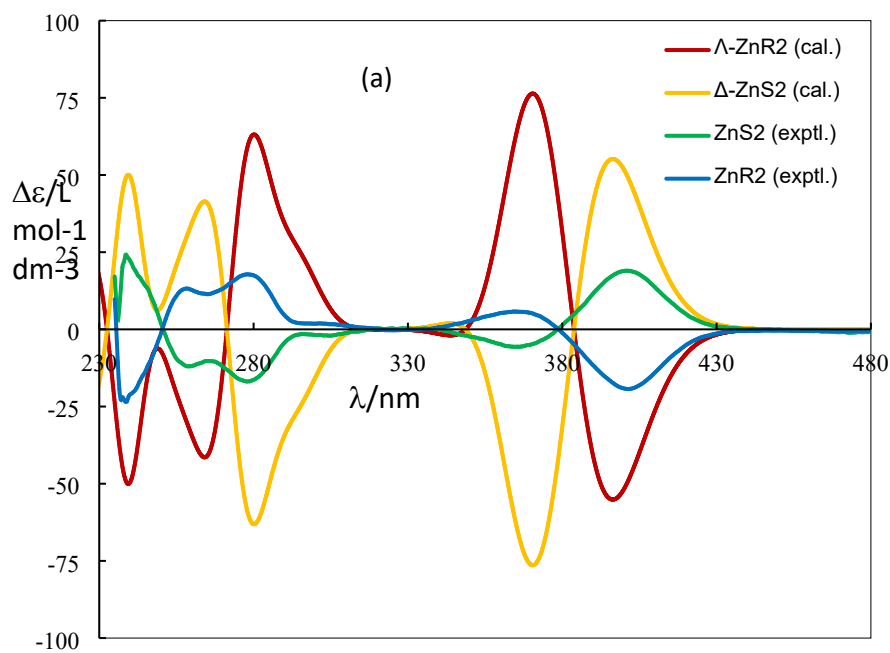

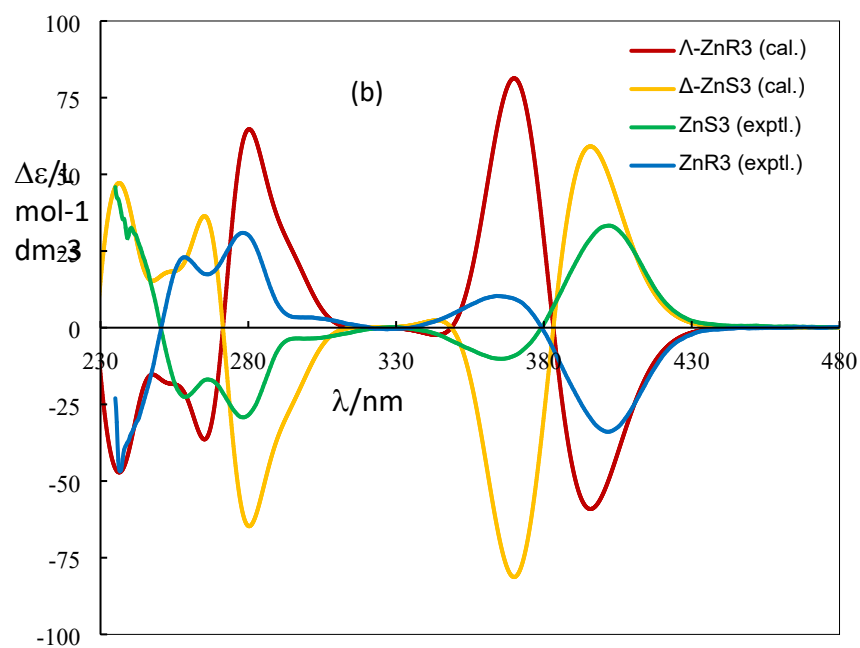

**Fig. S9** Experimental and simulated ECD spectra for enantiomeric pairs (a) ZnR2/ZnS2 and (b) ZnR3/ZnS3 (*ca.*  $3.00 \times 10^{-2}$  mM) in methanol/chloroform (50%, v/v) at 25 °C ( $\Delta\epsilon_{\text{exptl.}}$  values are increased by 2 times). Spectra simulated at b3lyp/tzvp//b3lyp/6-31G(d) with PCM in chloroform, respectively. Gaussian band shape with exponential half-width  $\sigma = 0.16$  eV.

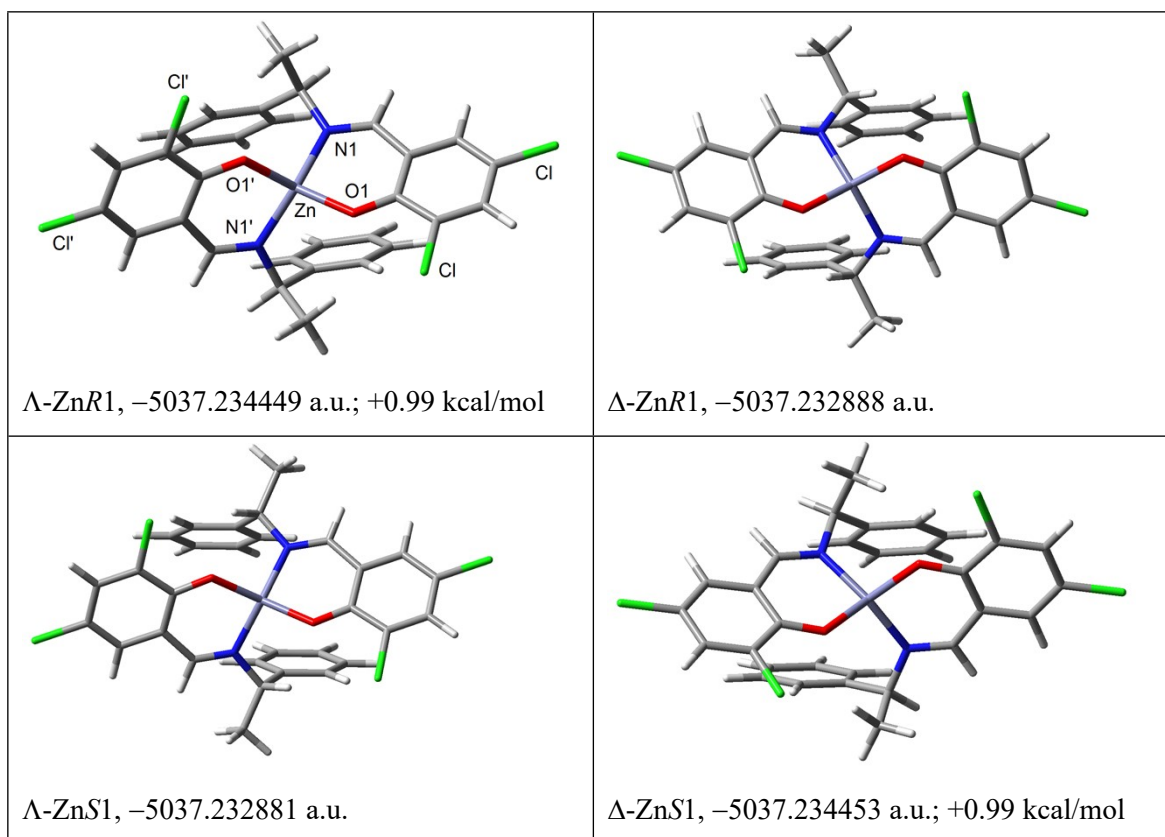

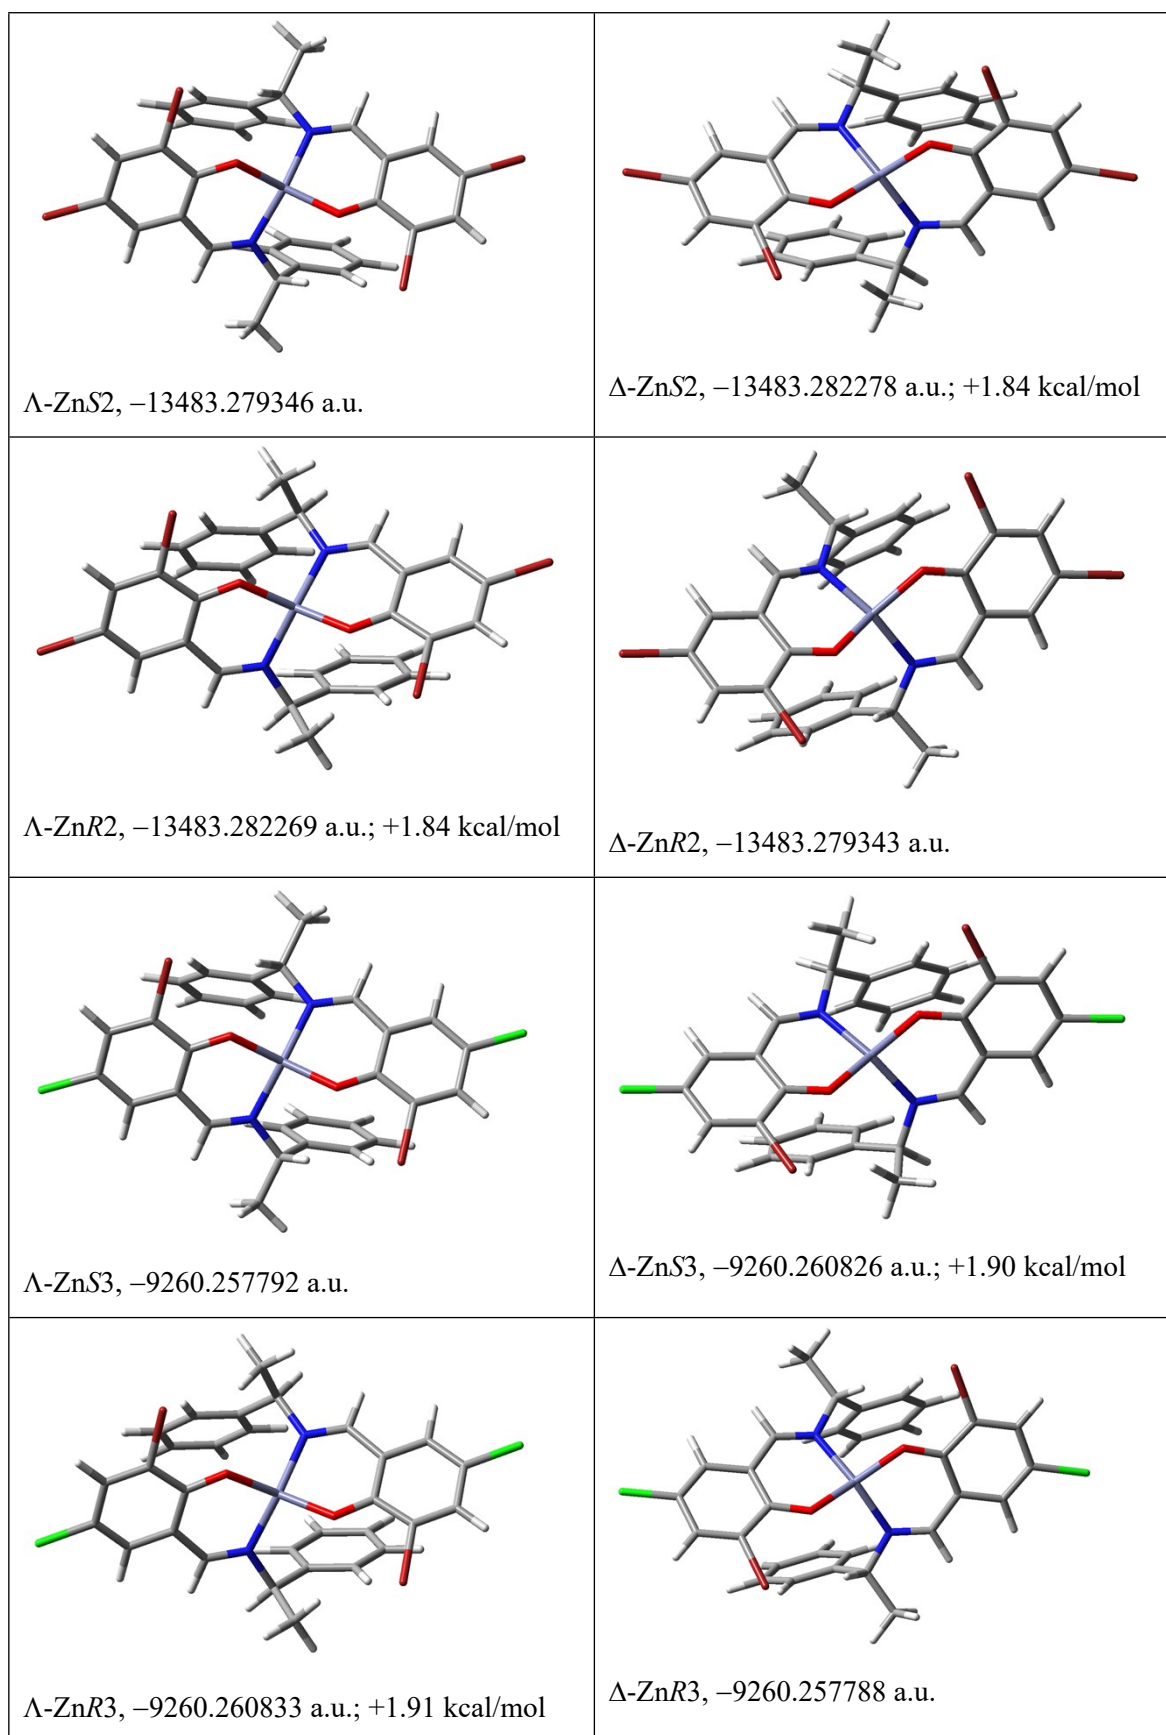

**Fig. S10** Optimized structures for diastereomeric pair  $\Lambda$ -Zn-R/ $\Delta$ -Zn-R and  $\Delta$ -Zn-S / $\Lambda$ -Zn-S at b3lyp/6-31g(d), respectively.

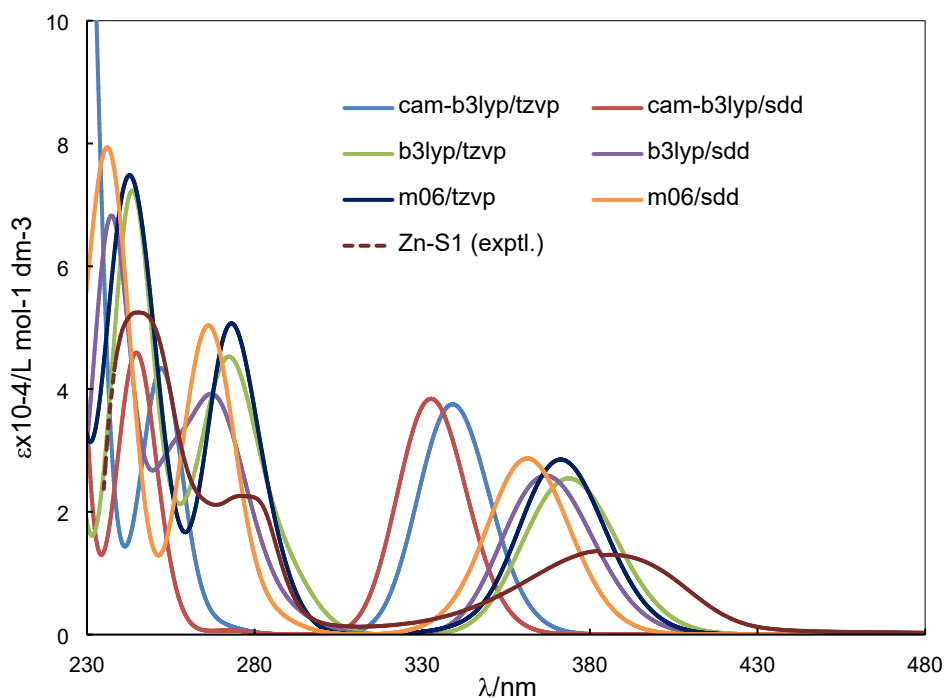

**Fig. S11** Experimental UV-Vis. spectrum for ZnS1 ( $3.22 \times 10^{-2}$  mM) in methanol/chloroform (50%, v/v) at 25 °C and computed UV-Vis. spectra for  $\Delta$ -ZnS1 at different functionals and the basis sets, respectively. Gaussian band shape with exponential half-width,  $\sigma = 0.16$  eV.

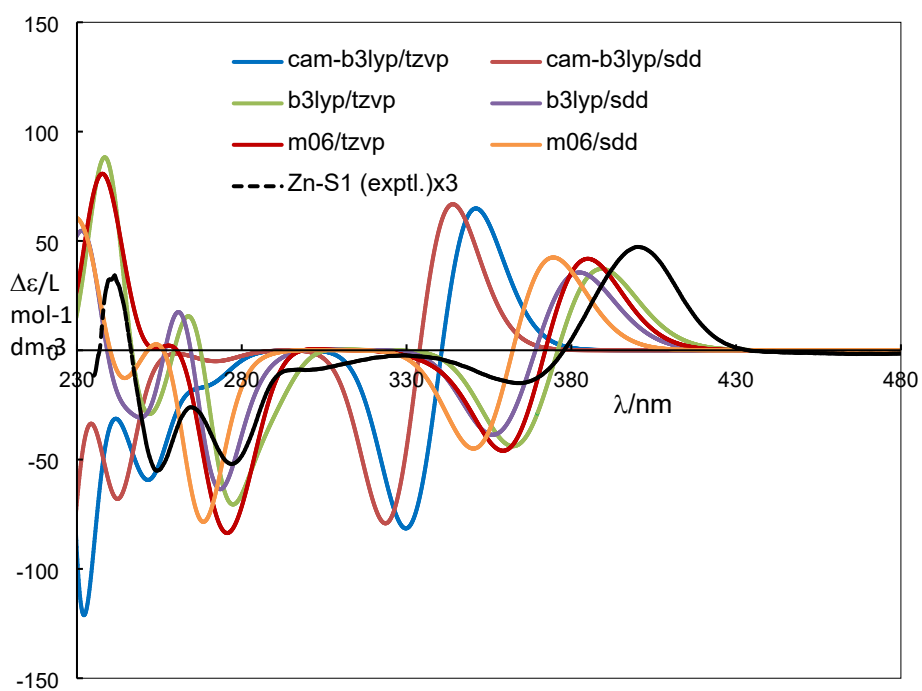

**Fig. S12** Experimental ECD spectra for Zn-S1 ( $\sim 3.00 \times 10^{-2}$  mM) in methanol/chloroform (50%, v/v) at 25 °C and computed ECD spectra for  $\Delta$ -ZnS1 at different functionals and the basis sets, respectively. Gaussian band shape with exponential half-width,  $\sigma = 0.16$  eV.

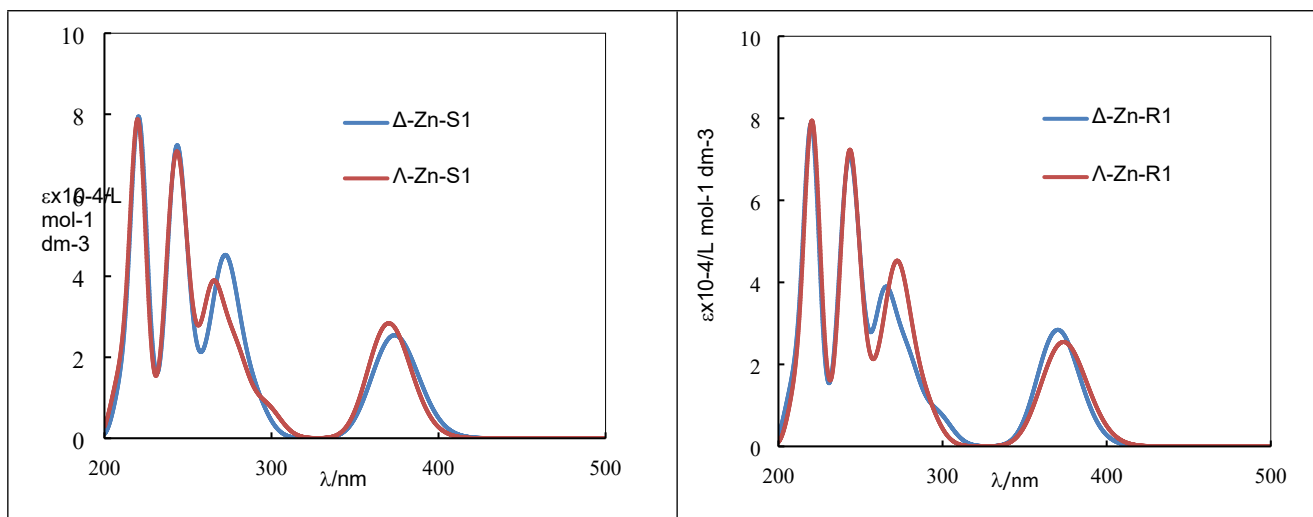

**Fig. S13** Calculated UV-Vis. spectra for diastereomeric pairs  $\Lambda$ -ZnS1/ $\Delta$ -ZnS1 and  $\Lambda$ -ZnR1/ $\Delta$ -ZnR1 at b3lyp/tzvp//b3lyp/6-31g(d), respectively. Gaussian band shape with exponential half-width  $\sigma = 0.16$  eV.

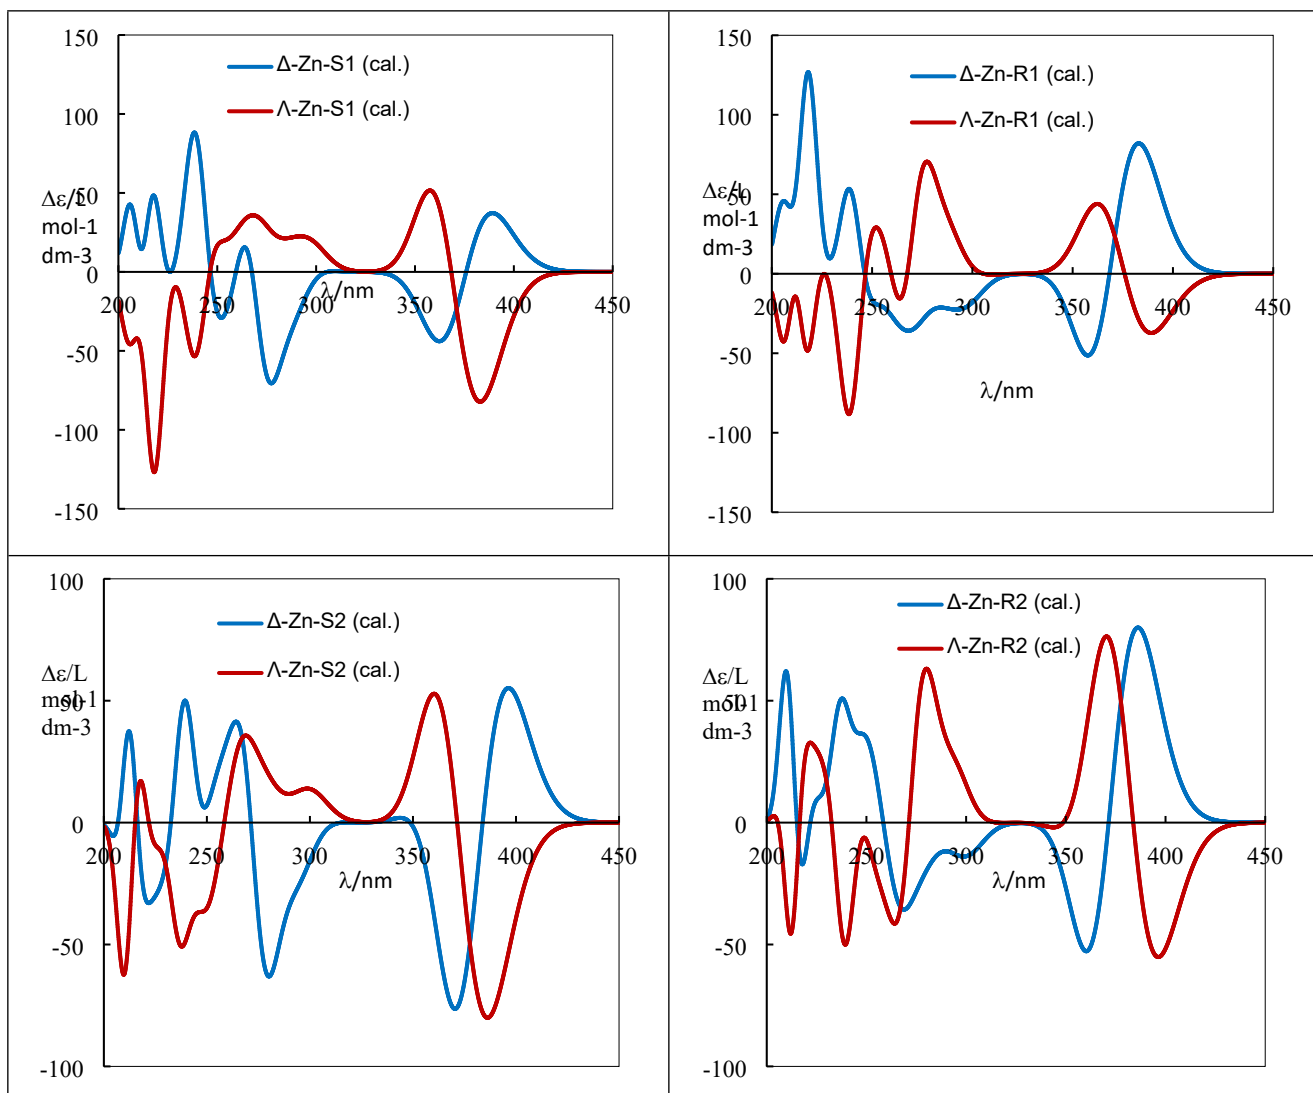

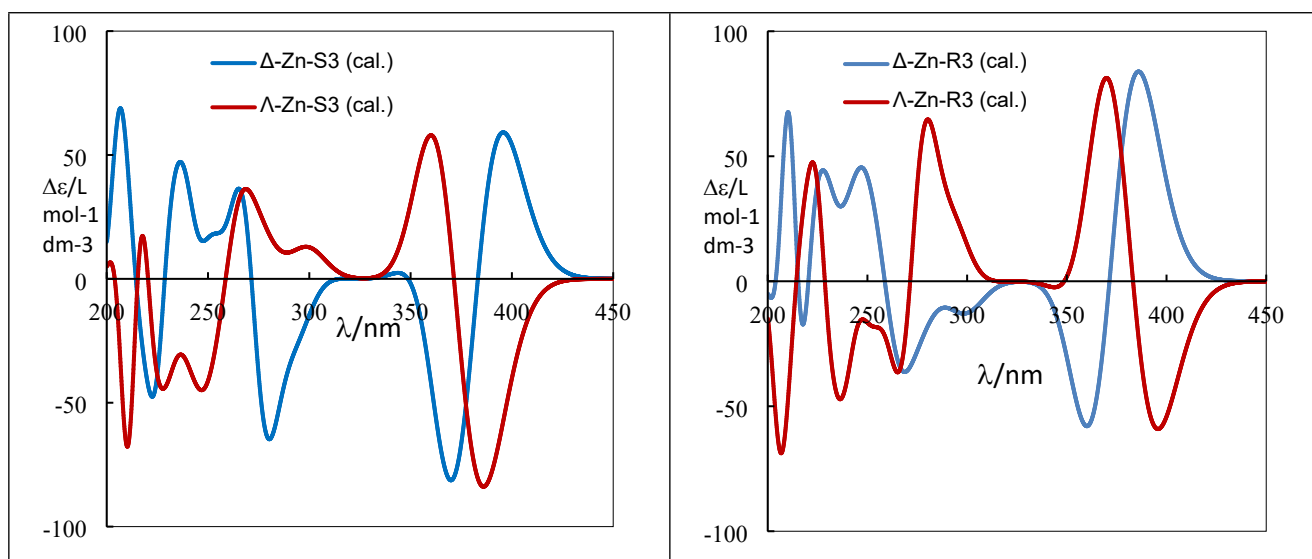

**Fig. S14** Calculated ECD spectra for diastereomeric pairs  $\Lambda/\Delta$ -ZnS1 and  $\Lambda/\Delta$ -ZnR1;  $\Lambda/\Delta$ -ZnS2 and  $\Lambda/\Delta$ -ZnR2;  $\Lambda/\Delta$ -ZnS3 and  $\Lambda/\Delta$ -ZnR3 at b3lyp/tzvp//b3lyp/6-31g(d), respectively. Gaussian band shape with exponential half-width  $\sigma = 0.16$  eV.

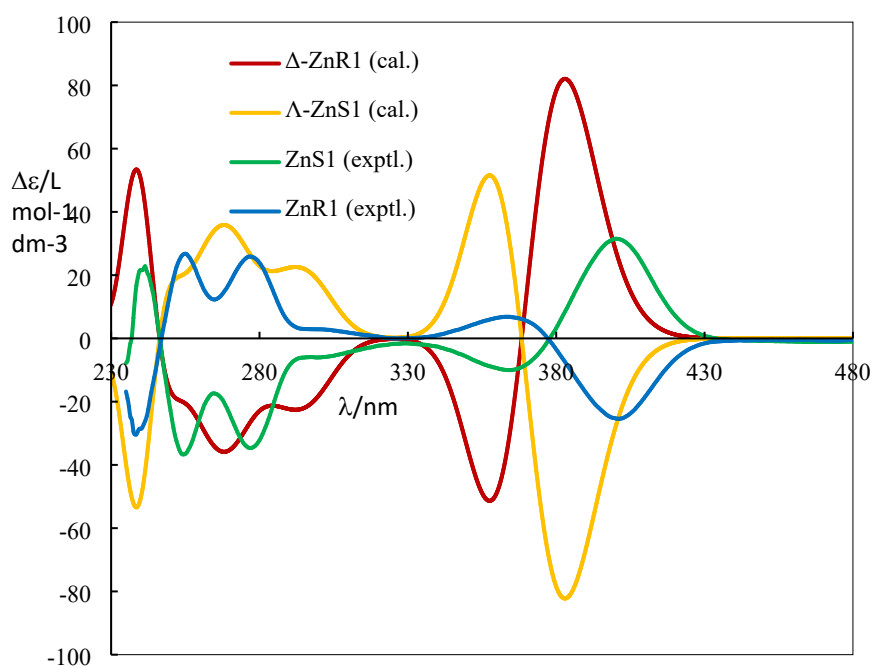



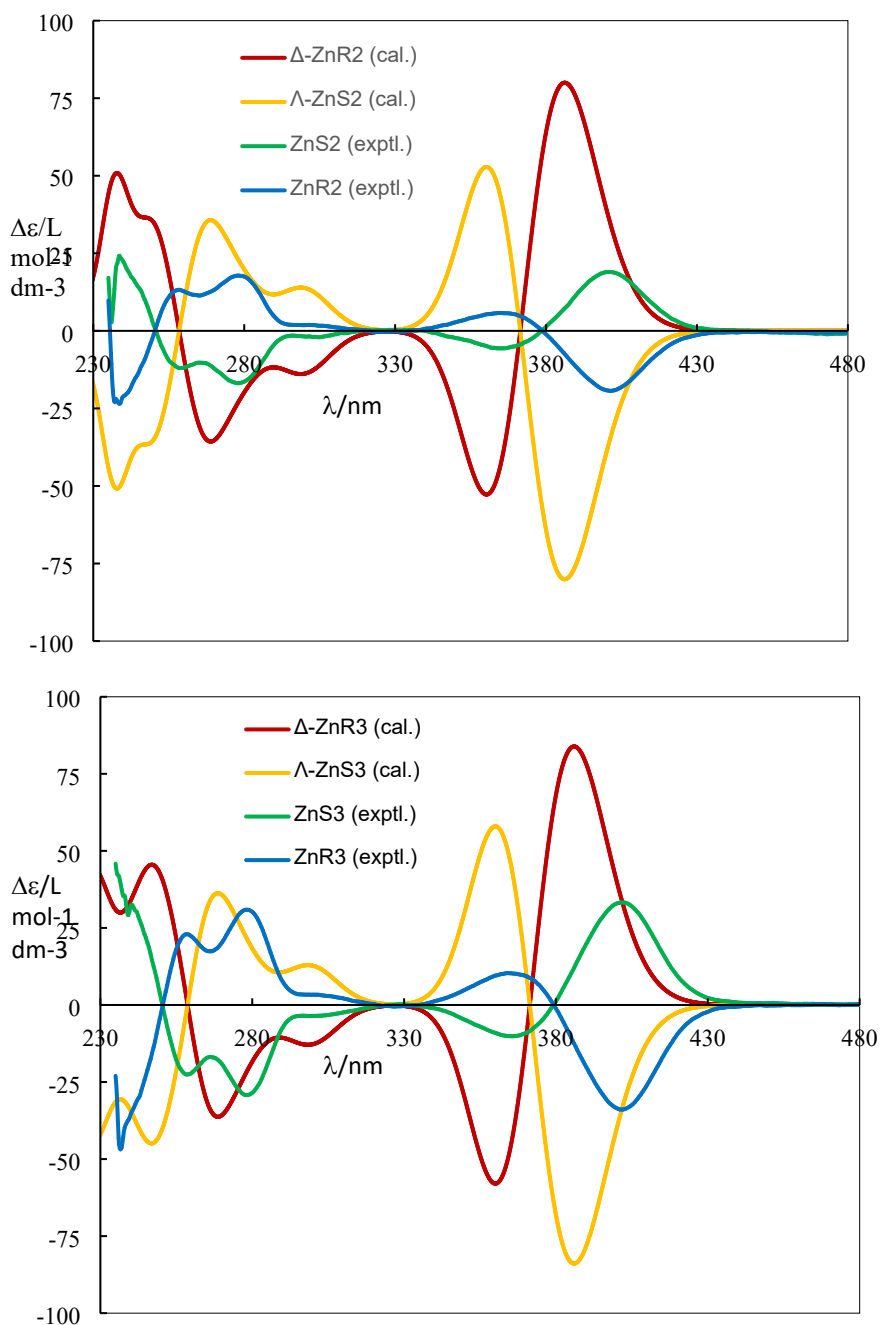

**Fig. S15** Experimental and simulated ECD spectra (the opposite comparison) for ZnR1/ZnS1, ZnR2/ZnS2 and ZnR3/ZnS3 (ca.  $3.00 \times 10^{-2}$  mM) in methanol/chloroform (50%, v/v) at 25 °C ( $\Delta\epsilon_{\text{exptl.}}$  values are increased by 2 times). Spectra simulated at b3lyp/tzvp//b3lyp/6-31G(d) with PCM in chloroform, respectively. Gaussian band shape with exponential half-width  $\sigma = 0.16$  eV.

**Table S1.** Crystal data and structure refinement for Zn(II)-Chiral Schiff bases complexes.

|                      | $\Lambda$ -ZnR1                                               | $\Lambda$ -ZnR2                                               | $\Lambda$ -ZnR3                                                          | $\Delta$ -ZnS1                                                | $\Delta$ -ZnS2                                                | $\Delta$ -ZnS3                                                           |
|----------------------|---------------------------------------------------------------|---------------------------------------------------------------|--------------------------------------------------------------------------|---------------------------------------------------------------|---------------------------------------------------------------|--------------------------------------------------------------------------|
| Empirical formula    | $\text{C}_{30}\text{H}_{24}\text{Cl}_4\text{ZnN}_2\text{O}_2$ | $\text{C}_{30}\text{H}_{24}\text{Br}_4\text{ZnN}_2\text{O}_2$ | $\text{C}_{30}\text{H}_{24}\text{Br}_2\text{Cl}_2\text{ZnN}_2\text{O}_2$ | $\text{C}_{30}\text{H}_{24}\text{Cl}_4\text{ZnN}_2\text{O}_2$ | $\text{C}_{30}\text{H}_{24}\text{Br}_4\text{ZnN}_2\text{O}_2$ | $\text{C}_{30}\text{H}_{24}\text{Br}_2\text{Cl}_2\text{ZnN}_2\text{O}_2$ |
| $M$ (g mol $^{-1}$ ) | 651.68                                                        | 829.52                                                        | 740.60                                                                   | 651.68                                                        | 829.52                                                        | 740.60                                                                   |
| Temperature (K)      | 160(1)                                                        | 160(1)                                                        | 160(1)                                                                   | 160(1)                                                        | 160(1)                                                        | 160(1)                                                                   |
| Wavelength (Å)       | 0.71073                                                       | 0.71073                                                       | 0.71073                                                                  | 0.71073                                                       | 0.71073                                                       | 1.54184                                                                  |
| Crystal system       | monoclinic                                                    | monoclinic                                                    | monoclinic                                                               | monoclinic                                                    | monoclinic                                                    | monoclinic                                                               |

|                                                                                                  |                 |                   |                 |                 |                |                  |
|--------------------------------------------------------------------------------------------------|-----------------|-------------------|-----------------|-----------------|----------------|------------------|
| Space group                                                                                      | I2              | I2                | I2              | I2              | I2             | I2               |
| <i>a</i> (Å)                                                                                     | 10.08126(12)    | 10.2155(3)        | 10.21573(14)    | 10.0890(3)      | 10.2179(3)     | 10.2247(2)       |
| <i>b</i> (Å)                                                                                     | 10.86962(12)    | 10.9297(3)        | 10.88240(13)    | 10.8821(3)      | 10.9275(3)     | 10.8940(3)       |
| <i>c</i> (Å)                                                                                     | 12.76560(16)    | 12.9935(3)        | 12.90981(18)    | 12.7748(3)      | 12.9953(4)     | 12.9214(3)       |
| $\beta$ (°)                                                                                      | 106.5627(13)    | 106.622(3)        | 107.2179(14)    | 106.586(3)      | 106.617(3)     | 107.216(3)       |
| <i>V</i> (Å <sup>3</sup> )                                                                       | 1340.81(3)      | 1390.14(7)        | 1370.89(3)      | 1344.19(7)      | 1390.41(8)     | 1374.80(6)       |
| <i>Z</i> / <i>D</i> <sub>calc.</sub> (g cm <sup>-3</sup> )                                       | 2/ 1.614        | 2/ 1.982          | 2/1.794         | 2/1.610         | 2/1.981        | 2/1.789          |
| $\mu$ (mm <sup>-1</sup> )                                                                        | 1.348           | 6.665             | 4.038           | 1.344           | 6.663          | 6.697            |
| F(000)                                                                                           | 664.0           | 808.0             | 736.0           | 664.0           | 808.0          | 736.0            |
| $\theta$ range (°)                                                                               | 5.012 to 61.012 | 4.96 to 52.734    | 5.608 to 52.744 | 5.636 to 52.738 | 4.96 to 52.728 | 9.744 to 148.854 |
| <i>h</i> ; <i>k</i> ; <i>l</i> ranges                                                            | ±14; ±15; ±18   | ±12; ±13; -15,+16 | ±12; ±13; ±16   | ±12; ±13; ±15   | ±12; ±13; ±16  | ±12; ±13; ±16    |
| Reflections collected                                                                            | 20946           | 14589             | 15540           | 12841           | 14735          | 8416             |
| Independent reflect. ( <i>R</i> <sub>int</sub> )                                                 | 4106 (0.0211)   | 2841 (0.0208)     | 2801 (0.0223)   | 2754 (0.0325)   | 2839 (0.0411)  | 2762 (0.0154)    |
| Data/restraints/parameters                                                                       | 4106/1/178      | 2841/1/178        | 2801/1/178      | 2754/1/178      | 2839/1/178     | 2762/1/178       |
| Goodness-of-fit on <i>F</i> <sup>2a</sup>                                                        | 1.066           | 1.058             | 1.056           | 1.034           | 0.997          | 1.057            |
| <i>R</i> <sub>1</sub> / <i>wR</i> <sub>2</sub> [ <i>I</i> >2 $\sigma$ ( <i>I</i> )] <sup>b</sup> | 0.0189/ 0.0511  | 0.0134/0.0330     | 0.0185/0.0472   | 0.0238/0.0558   | 0.0180/0.0416  | 0.0222/0.0587    |
| <i>R</i> <sub>1</sub> / <i>wR</i> <sub>2</sub> (all data) <sup>b</sup>                           | 0.0192/ 0.0512  | 0.0138/0.0332     | 0.0186/0.0473   | 0.0265/0.0572   | 0.0193/0.0418  | 0.0224/0.0589    |
| Max./min. $\Delta\rho$ (e. Å <sup>-3</sup> ) <sup>c</sup>                                        | 0.50/-0.18      | 0.31/-0.17        | 0.17/-0.21      | 0.45/-0.27      | 0.45/-0.27     | 0.19/-0.51       |
| Flack parameter <sup>d</sup>                                                                     | -0.004(3)       | -0.010(4)         | -0.003(8)       | -0.010(6)       | 0.011(5)       | -0.007(19)       |
| CCDC number                                                                                      | 2000646         | 2000644           | 2000648         | 2000652         | 2000650        | 2000653          |
| Code                                                                                             | hadi2711        | hadi1611          | Hadi2111        | hadi2211        | hadi1511       | Hadi2011         |

<sup>a</sup> Goodness-of-fit =  $[\sum[w(F_o^2 - F_c^2)^2]/(n - p)]^{1/2}$ ; <sup>b</sup>  $R_1 = [\sum(|F_o| - |F_c|)]/\sum|F_o|$ ;  $wR_2 = [\sum[w(F_o^2 - F_c^2)^2]/\sum[w(F_o^2)^2]]^{1/2}$ ; <sup>c</sup>

Largest difference peak and hole; <sup>d</sup> Absolute structure parameter.<sup>1-4</sup>

**Table S2.** Values of dihedral angle ( $\theta$ /°) and geometric indexes ( $\tau_{\text{tet-sq}}$  and  $\tau_4$ ) in the Zn(II)-*chiral* Schiff base complexes.

| Entity          | X <sub>1</sub> , X <sub>2</sub> | $\theta$ /° | $\tau_{\text{tet-sq}}$ <sup>a</sup> | $\tau_4$ <sup>b</sup> |
|-----------------|---------------------------------|-------------|-------------------------------------|-----------------------|
| $\Lambda$ -ZnR1 | Cl, Cl                          | 75.93       | 0.84                                | 0.75                  |
| $\Delta$ -ZnS1  | Cl, Cl                          | 76.14       | 0.85                                | 0.75                  |
| $\Lambda$ -ZnR2 | Br, Br                          | 75.92       | 0.84                                | 0.75                  |
| $\Delta$ -ZnS2  | Br, Br                          | 76.10       | 0.85                                | 0.75                  |
| $\Lambda$ -ZnR3 | ClBr                            | 75.46       | 0.84 0.84                           | 0.75                  |
| $\Delta$ -ZnS3  | ClBr                            | 75.47       |                                     | 0.75                  |

<sup>a</sup>  $\tau_{\text{tet-sq}} = \theta/90$ . <sup>b</sup>  $\tau_4 = [\{360^\circ - (\alpha + \beta)\}/141]^\circ$ , where  $\alpha$ ,  $\beta$  are the two largest angles in Table 1. Note:  $\theta$  should be 90° for a tetrahedral geometry and 0° for a square planar geometry (not considering the imminent distortion induced by the chelate ring formation).<sup>51</sup> Accordingly  $\tau_{\text{tet-sq}} = 1.00$  for tetrahedral and 0.00 for square planar geometry.  $\tau_4 = 1.00$  for a perfect tetrahedral geometry and 0.00 for a perfect square planar geometry.<sup>52</sup> For two chelate ligands, as in the present bis-bidentate Schiff base complexes,  $\tau_4$  will not correctly assess a tetrahedral geometry because of the already imminent distortion induced by the chelate ring formation.

**Table S3.** Supramolecular X...O(1) interactions in Zn(II)-complexes.

| Entity | X = | X...O(1)/Å | C(4)—X...O(1)/° | C(1)—O(1)···X/° | < or > normal<br>X...O bond (%) |
|--------|-----|------------|-----------------|-----------------|---------------------------------|
|--------|-----|------------|-----------------|-----------------|---------------------------------|

|                  |       |       |         |         |        |
|------------------|-------|-------|---------|---------|--------|
| $\Lambda$ -Zn-R1 | Cl(2) | 3.402 | 141.220 | 143.575 | + 1.85 |
| $\Delta$ -Zn-S1  | Cl(2) | 3.407 | 141.210 | 143.677 | + 2.00 |
| $\Lambda$ -Zn-R2 | Br(2) | 3.342 | 141.265 | 143.069 | - 3.13 |
| $\Delta$ -Zn-S2  | Br(2) | 3.345 | 141.234 | 143.056 | - 3.04 |
| $\Lambda$ -Zn-R3 | Cl(1) | 3.431 | 140.984 | 143.062 | + 2.72 |
| $\Delta$ -Zn-S3  | Cl(1) | 3.433 | 141.163 | 143.404 | + 2.78 |

**Table S4.** Geometrical parameters ( $\text{\AA}$  and  $^\circ$ ) for descriptions of C–X $\cdots\pi$  interactions in Zn(II)-complexes.

Definition of geometrical C–X $\cdots\pi$  parameters

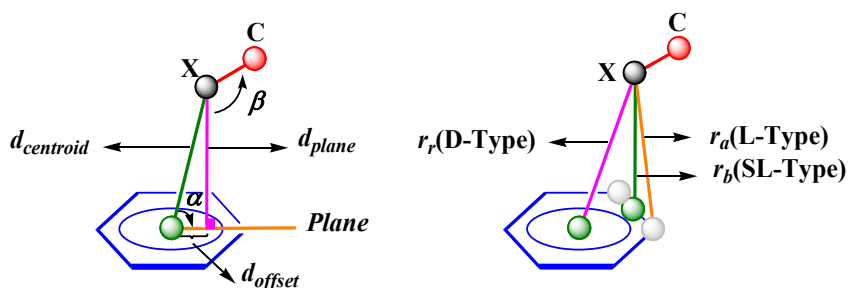

|                                      | $\Lambda$ -ZnR1/ $\Delta$ -ZnS1 | $\Lambda$ -ZnR2/ $\Delta$ -ZnS2 | $\Lambda$ -ZnR3/ $\Delta$ -ZnS3 |
|--------------------------------------|---------------------------------|---------------------------------|---------------------------------|
| C–X $\cdots\pi$ <sup>1</sup>         | C–Cl <sub>1</sub> $\cdots\pi$   | C–Br <sub>1</sub> $\cdots\pi$   | C–Br <sub>1</sub> $\cdots\pi$   |
| $r_r$ / $\text{\AA}$                 | 3.883/3.885                     | 3.806/3.807                     | 3.790/3.793                     |
| $r_a$ / $\text{\AA}$                 | 3.523/3.527 (C9)                | 3.473/3.473 (C9)                | 3.454 (C14)/3.463 (C10)         |
| $r_b$ / $\text{\AA}$                 | 3.472/3.474                     | 3.404/3.404                     | 3.390/3.395                     |
| $D_{\text{plane}}$ / $\text{\AA}$    | 3.402/3.404                     | 3.341/3.342                     | 3.333/3.337                     |
| $d_{\text{centroid}}$ / $\text{\AA}$ | 3.883/3.885                     | 3.806/3.807                     | 3.790/3.793                     |
| $d_{\text{offset}}$ / $\text{\AA}$   | 1.872/1.871                     | 1.823/1.822                     | 1.805/1.803                     |
| $\alpha$ / $^\circ$                  | 61.17/61.21                     | 61.38/61.41                     | 61.56/61.61                     |
| $\beta$ / $^\circ$                   | 145.18/144.97                   | 145.64/145.66                   | 146.16/146.18                   |
| Type                                 | SL                              | SL                              | SL                              |

<sup>1</sup>  $\pi$  (C<sub>9</sub>-C<sub>14</sub>).

**Analysis of intra-molecular interactions for the  $\Delta$ -ZnS/ $\Lambda$ -ZnS, resp.  $\Lambda$ -ZnR/ $\Delta$ -ZnR diastereomeric difference.**

**Table S5.** 70 Strongest inter-fragment interactions as IBSIW index for  $\Delta$ -ZnS1.

| atom # Frag1 | atom # Frag2 <sup>a</sup> | IBSIW index<br>[a.u./Å <sup>2</sup> ] | Interaction       |
|--------------|---------------------------|---------------------------------------|-------------------|
| 27           | 63                        | 1.558382                              | (CH3)C-H...O      |
| 31           | 59                        | 1.557899                              | O...H-C(CH3)      |
| 15           | 33                        | 0.997136                              | (Ph)C-H...C(sal)  |
| 1            | 47                        | 0.996316                              | (sal)C...H-C(Ph)  |
| 15           | 63                        | 0.906876                              | (Ph)C-H...O       |
| 31           | 47                        | 0.905773                              | O...H-C(Ph)       |
| 31           | 62                        | 0.623283                              | O...N             |
| 30           | 63                        | 0.623207                              | N...O             |
| 28           | 59                        | 0.448733                              | Cl...H-C(CH3)     |
| 27           | 60                        | 0.448715                              | (CH3)C-H...Cl     |
| 1            | 46                        | 0.445425                              | (sal)C...C(Ph)    |
| 14           | 33                        | 0.445102                              | (Ph)C...C(sal)    |
| 31           | 46                        | 0.429735                              | O...C(Ph)         |
| 14           | 63                        | 0.429632                              | (Ph)C...O         |
| 31           | 56                        | 0.418336                              | O...C(CH3)        |
| 24           | 63                        | 0.418314                              | (CH3)C...O        |
| 21           | 53                        | 0.371012                              | (Ph)C-H...H-C(Ph) |
| 2            | 47                        | 0.350234                              | (sal)C...H-C(Ph)  |
| 15           | 34                        | 0.350018                              | (Ph)C-H...C(sal)  |
| 27           | 33                        | 0.345781                              | (CH3)C-H...C(sal) |
| 1            | 59                        | 0.345639                              | (sal)C...H-C(CH3) |
| 20           | 52                        | 0.321164                              | (Ph)C...C(Ph)     |
| 15           | 40                        | 0.302054                              | (Ph)C-H...C(sal)  |
| 8            | 47                        | 0.301647                              | (sal)C...H-C(Ph)  |
| 31           | 63                        | 0.296042                              | O...O             |
| 22           | 52                        | 0.293353                              | (Ph)C...C(Ph)     |
| 20           | 54                        | 0.293054                              | (Ph)C...C(Ph)     |
| 31           | 43                        | 0.289533                              | O...C(C-methin)   |
| 11           | 63                        | 0.289405                              | (methin-C)C...O   |
| 22           | 54                        | 0.261365                              | (Ph)C...C(Ph)     |
| 8            | 46                        | 0.255609                              | (sal)C...C(Ph)    |
| 14           | 40                        | 0.255479                              | (Ph)C...C(sal)    |
| 20           | 53                        | 0.254196                              | (Ph)C...H-C(Ph)   |
| 21           | 52                        | 0.253586                              | (Ph)C-H...C(Ph)   |
| 20           | 55                        | 0.222963                              | (Ph)C...H-C(Ph)   |
| 23           | 52                        | 0.222903                              | (Ph)C-H...C(Ph)   |
| 30           | 62                        | 0.200424                              | N...N             |
| 14           | 41                        | 0.183581                              | (Ph)C...C(imin)   |
| 9            | 46                        | 0.183569                              | (imin)C...C(Ph)   |
| 31           | 45                        | 0.175972                              | O...C(Ph)         |
| 13           | 63                        | 0.175729                              | (Ph)C...O         |
| 28           | 47                        | 0.160912                              | Cl...H-C(Ph)      |
| 15           | 60                        | 0.160718                              | (Ph)C-H...Cl      |
| 8            | 48                        | 0.155667                              | (sal)C...C(Ph)    |
| 16           | 40                        | 0.155500                              | (Ph)C...C(sal)    |
| 18           | 55                        | 0.154467                              | (Ph)C...H-C(Ph)   |
| 23           | 50                        | 0.154166                              | (Ph)C-H...C(Ph)   |
| 2            | 59                        | 0.153368                              | (sal)C...C(CH3)   |
| 27           | 34                        | 0.153359                              | (CH3)C-H...C(sal) |
| 14           | 62                        | 0.142815                              | (Ph)C...N         |
| 30           | 46                        | 0.142657                              | N...C(Ph)         |

|            |    |              |                   |
|------------|----|--------------|-------------------|
| 9          | 48 | 0.132594     | (imin)C...C(Ph)   |
| 16         | 41 | 0.132553     | (Ph)C...C(imin)   |
| 22         | 53 | 0.121706     | (Ph)C...H-C(Ph)   |
| 21         | 54 | 0.121308     | (Ph)C-H...C(Ph)   |
| 8          | 49 | 0.116124     | (sal)C...H-C(Ph)  |
| 17         | 40 | 0.116070     | (Ph)C-H...C(sal)  |
| 1          | 48 | 0.113776     | (sal)C...C(Ph)    |
| 16         | 33 | 0.113625     | (Ph)C...C(sal)    |
| 18         | 54 | 0.106890     | (Ph)C...C(Ph)     |
| 22         | 50 | 0.106832     | (Ph)C...C(Ph)     |
| 30         | 45 | 0.105881     | N...C(Ph)         |
| 13         | 62 | 0.105762     | (Ph)C...N         |
| 2          | 46 | 0.104529     | (sal)C...C(Ph)    |
| 14         | 34 | 0.104384     | (Ph)C...C(sal)    |
| 15         | 41 | 0.103609     | (Ph)C-H...C(imin) |
| 9          | 47 | 0.103389     | (imin)C...H-C(Ph) |
| 22         | 55 | 0.102645     | (Ph)C...H-C(Ph)   |
| 23         | 54 | 0.102522     | (Ph)C-H...C(Ph)   |
| 28         | 56 | 0.098306     | Cl...C(CH3)       |
| <b>SUM</b> |    | <b>22.09</b> |                   |

<sup>a</sup> Fragment 1 is the ligand with atom numbers 1-31, fragment 2 the ligand with atom numbers 33-63. For atom numbering see the following graph:

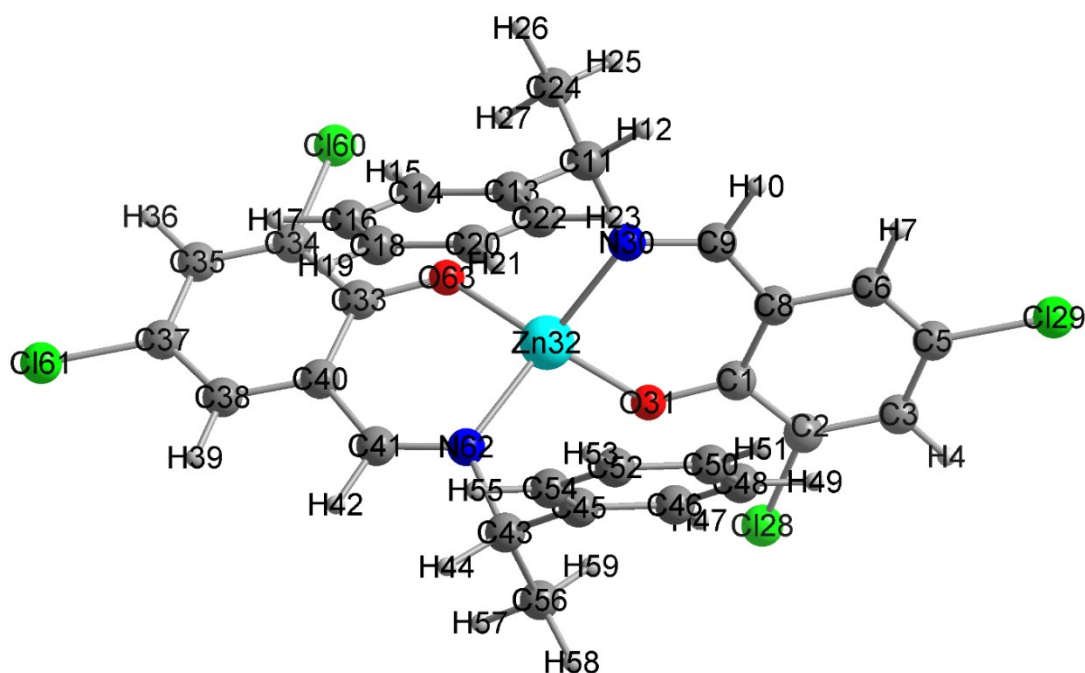

**Table S6.** 70 Strongest inter-fragment interactions as IBSIW index for  $\Lambda$ -ZnS1.

| atom # Frag1 | atom # Frag2 <sup>a</sup> | IBSIW index [a.u./Å <sup>2</sup> ] | Interaction       |
|--------------|---------------------------|------------------------------------|-------------------|
| 12           | 63                        | 1.635349                           | (methin)C-H...O   |
| 31           | 44                        | 1.634854                           | O...H-C(methin)   |
| 30           | 63                        | 0.861119                           | N...O             |
| 31           | 62                        | 0.860700                           | O...N             |
| 11           | 63                        | 0.699037                           | (methin)C...O     |
| 31           | 43                        | 0.698832                           | O...C(methin)     |
| 21           | 53                        | 0.490237                           | (Ph)C-H...H-C(Ph) |
| 20           | 52                        | 0.463831                           | (Ph)C...C(Ph)     |
| 21           | 52                        | 0.405366                           | (Ph)C-H...C(Ph)   |
| 20           | 53                        | 0.405207                           | (Ph)C...H-C(Ph)   |

|    |    |          |                      |
|----|----|----------|----------------------|
| 1  | 47 | 0.392874 | (sal)C...H-C(Ph)     |
| 15 | 33 | 0.392374 | (Ph)C-H...C(sal)     |
| 12 | 33 | 0.349622 | (methin)C-H...C(sal) |
| 1  | 44 | 0.349489 | (sal)C...H-C(methin) |
| 31 | 47 | 0.267812 | O...H-C(Ph)          |
| 15 | 63 | 0.267390 | (Ph)C-H...O          |
| 2  | 47 | 0.256915 | (sal)C...H-C(Ph)     |
| 15 | 34 | 0.256768 | (Ph)C-H...C(sal)     |
| 12 | 60 | 0.251530 | (methin)C-H...Cl     |
| 28 | 44 | 0.251474 | Cl...H-C(methin)     |
| 1  | 46 | 0.240414 | (sal)C...C(Ph)       |
| 14 | 33 | 0.240302 | (Ph)C...C(sal)       |
| 20 | 54 | 0.226918 | (Ph)C...C(Ph)        |
| 22 | 52 | 0.226912 | (Ph)C...C(Ph)        |
| 31 | 63 | 0.212265 | O...O                |
| 13 | 63 | 0.205910 | (Ph)C...O            |
| 31 | 45 | 0.205861 | O...C(Ph)            |
| 22 | 54 | 0.202005 | (Ph)C...C(Ph)        |
| 31 | 46 | 0.197169 | O...C(Ph)            |
| 14 | 63 | 0.197005 | (Ph)C...O            |
| 28 | 47 | 0.189200 | (Ph)C-H...Cl         |
| 15 | 60 | 0.189046 | Cl...H-C(Ph)         |
| 30 | 62 | 0.171955 | N...N                |
| 11 | 33 | 0.150363 | (methin)C...C(sal)   |
| 1  | 43 | 0.150317 | (sal)C...C(methin)   |
| 21 | 50 | 0.146598 | (Ph)C-H...C(Ph)      |
| 18 | 53 | 0.146473 | (Ph)C...H-C(Ph)      |
| 23 | 52 | 0.120439 | (Ph)C-H...C(Ph)      |
| 20 | 55 | 0.120400 | (Ph)C...H-C(Ph)      |
| 12 | 34 | 0.117854 | (methin)C-H...C(sal) |
| 2  | 44 | 0.117782 | (sal)C...H-C(methin) |
| 20 | 50 | 0.113147 | (Ph)C...C(Ph)        |
| 18 | 52 | 0.113082 | (Ph)C...C(Ph)        |
| 13 | 33 | 0.111814 | (Ph)C...C(sal)       |
| 1  | 45 | 0.111773 | (sal)C...C(Ph)       |
| 30 | 33 | 0.104050 | N...C(sal)           |
| 1  | 62 | 0.104023 | (sal)C...N           |
| 14 | 40 | 0.103307 | (sal)C...C(Ph)       |
| 8  | 46 | 0.103301 | (Ph)C...C(sal)       |
| 8  | 47 | 0.101304 | (sal)C...H-C(Ph)     |
| 15 | 40 | 0.101225 | (Ph)C-H...C(sal)     |
| 21 | 54 | 0.095149 | (Ph)C-H...C(Ph)      |
| 22 | 53 | 0.095104 | (Ph)C...H-C(Ph)      |
| 23 | 50 | 0.094665 | (Ph)C-H...C(Ph)      |
| 18 | 55 | 0.094569 | (Ph)C...H-C(Ph)      |
| 22 | 50 | 0.089953 | (Ph)C...C(Ph)        |
| 18 | 54 | 0.089914 | (Ph)C...C(Ph)        |
| 2  | 46 | 0.088889 | (Ph)C...C(sal)       |
| 14 | 34 | 0.088872 | (sal)C...C(Ph)       |
| 9  | 63 | 0.086210 | (imin)C...O          |
| 31 | 41 | 0.086188 | O...C(sal)           |
| 23 | 54 | 0.077541 | (Ph)C-H...C(Ph)      |
| 22 | 55 | 0.077529 | (Ph)C...H-C(Ph)      |
| 22 | 45 | 0.071673 | (Ph)C...C(Ph)        |
| 13 | 54 | 0.071616 | (Ph)C...C(Ph)        |
| 21 | 51 | 0.070256 | (Ph)C-H...H-C(Ph)    |
| 19 | 53 | 0.070212 | (Ph)C-H...H-C(Ph)    |
| 13 | 62 | 0.061649 | (Ph)C...N            |
| 30 | 45 | 0.061640 | N...C(Ph)            |

|            |              |                  |
|------------|--------------|------------------|
| 3 47       | 0.054666     | (sal)C...H-C(Ph) |
| <b>Sum</b> | <b>17.56</b> |                  |

<sup>a</sup> Fragment 1 is the ligand with atom numbers 1-31, fragment 2 the ligand with atom numbers 33-63. For atom numbering see the following graph:

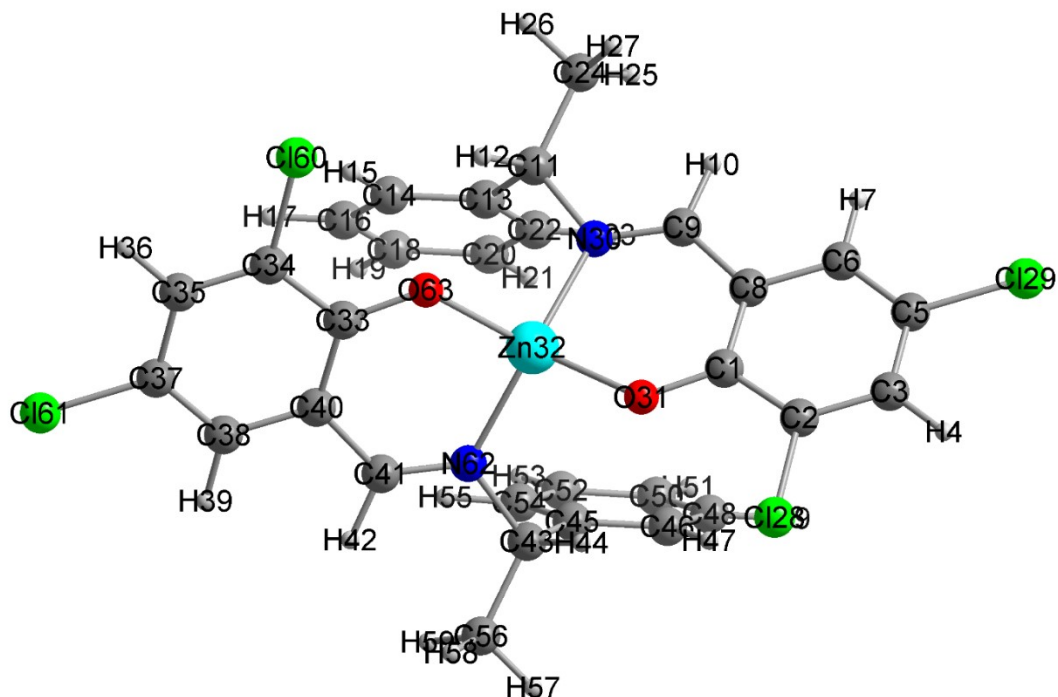

**Table S7.** Sum of related IBSIW indices for each atom in the fragments in the  $\Delta$ -ZnS1 and  $\Lambda$ -ZnS1 diastereomers and the largest differences between  $\Delta$ -ZnS1 and  $\Lambda$ -ZnS1.

| atom # in<br>Frag1, Frag2 <sup>a</sup> | $\Delta$ -ZnS1                            |                                           | $\Lambda$ -ZnS1                           |                                          | difference<br>$\Delta$ -ZnS1 –<br>$\Lambda$ -ZnS1 <sup>b</sup> |
|----------------------------------------|-------------------------------------------|-------------------------------------------|-------------------------------------------|------------------------------------------|----------------------------------------------------------------|
|                                        | Frag 1<br>IBSIW<br>[a.u./Å <sup>2</sup> ] | Frag 2<br>IBSIW<br>[a.u./Å <sup>2</sup> ] | Frag 1<br>IBSIW<br>[a.u./Å <sup>2</sup> ] | Frag2<br>IBSIW<br>[a.u./Å <sup>2</sup> ] |                                                                |
| O 31, 63                               | 5.016727                                  | 5.017636                                  | 4.312783                                  | 4.313428                                 | 0.70                                                           |
| (Ph)H 15, 47                           | 3.067974                                  | 3.065524                                  | 1.371806                                  | 1.373200                                 | 1.70                                                           |
| (CH <sub>3</sub> )H 27, 59             | 2.587759                                  | 2.587120                                  | 0.018957                                  | 0.006196                                 | 2.57                                                           |
| (sal)C 1, 33                           | 2.433725                                  | 2.433980                                  | 1.500074                                  | 1.499688                                 | 0.93                                                           |
| (Ph)C 14, 46                           | 1.855479                                  | 1.855743                                  | 0.935916                                  | 0.936427                                 | 0.92                                                           |
| N 30, 62                               | 1.497890                                  | 1.497993                                  | 1.457919                                  | 1.457443                                 |                                                                |
| (Ph)C 20, 52                           | 1.288187                                  | 1.288282                                  | 1.462662                                  | 1.462719                                 |                                                                |
| (Ph)C 22, 54                           | 1.184627                                  | 1.184643                                  | 0.946608                                  | 0.946410                                 |                                                                |
| (sal)C 8, 40                           | 1.025359                                  | 1.025272                                  | 0.428478                                  | 0.428454                                 | 0.60                                                           |
| (Ph)H, 21, 53                          | 0.919401                                  | 0.920912                                  | 1.286846                                  | 1.286424                                 |                                                                |
| (Ph)C 13, 45                           | 0.859861                                  | 0.859959                                  | 0.754145                                  | 0.754100                                 |                                                                |
| Cl 28, 60                              | 0.832169                                  | 0.831889                                  | 0.601851                                  | 0.601769                                 |                                                                |
| (Ph)C 16, 48                           | 0.817376                                  | 0.817564                                  | 0.307468                                  | 0.307693                                 | 0.51                                                           |
| (Ph)H 23, 55                           | 0.782842                                  | 0.783780                                  | 0.532347                                  | 0.531955                                 |                                                                |

|                  |          |                                  |          |          |       |
|------------------|----------|----------------------------------|----------|----------|-------|
| (imin)C 9, 41    | 0.780965 | 0.781015                         | 0.354005 | 0.353962 |       |
| (sal)C 2, 34     | 0.760858 | 0.760285                         | 0.570532 | 0.570474 |       |
| (CH3)C 24, 56    | 0.689197 | 0.689216                         | 0.060345 | 0.060316 | 0.63  |
| (methin)C 11, 43 | 0.602369 | 0.602475                         | 1.102581 | 1.102276 | -0.50 |
| (Ph)C 18, 50     | 0.513108 | 0.512874                         | 0.508766 | 0.509105 |       |
| (Ph)H 17, 49     | 0.491622 | 0.491852                         | 0.090505 | 0.090587 |       |
| (sal)C 6, 38     | 0.250039 | 0.249909                         | 0.079437 | 0.079421 |       |
| (sal)C 3, 35     | 0.139626 | 0.139509                         | 0.101795 | 0.101775 |       |
| (Ph)H 19, 51     | 0.118323 | 0.118299                         | 0.157192 | 0.157271 |       |
| (imin)H 10, 42   | 0.105191 | 0.105189                         | 0.028772 | 0.028770 |       |
| (sal)C 5, 37     | 0.099346 | 0.099244                         | 0.043575 | 0.043571 |       |
| (CH3)H 25, 57    | 0.096290 | 0.096227                         | 0.006196 | 0.016851 |       |
| (CH3)H 26, 58    | 0.089178 | 0.089185                         | 0.016861 | 0.018938 |       |
| (methin)H 12, 44 | 0.062414 | 0.062402                         | 2.468030 | 2.467230 | -2.41 |
| (sal)H 7, 39     | 0.051562 | 0.051522                         | 0.010741 | 0.010739 |       |
| (sal)H 4, 36     | 0.015974 | 0.015954                         | 0.014845 | 0.014846 |       |
| Cl 29, 61        | 0.007498 | 0.007484                         | 0.002483 | 0.002483 |       |
| SUM (column)     | 29.04    | 29.04                            | 21.53    | 21.53    | 5.65  |
|                  |          | difference: 29.04 – 21.53 = 7.51 |          |          |       |

<sup>a</sup> Fragment 1 is the ligand with atom numbers 1-31, fragment 2 the ligand with atom numbers 33-63. See the graphs to Table S5 and Table S6 for atom numbering.

<sup>b</sup> Rounded values and average from the differences between the Fragments 1 and the Fragments 2, respectively.

**Table S8.** Selected inter-fragment interactions as IBSIW index with the largest differences between  $\Delta$ -ZnS1 and  $\Lambda$ -ZnS1 (cf. Table S7).<sup>a</sup>

**a)**

| atom # 15 (resp. atom # 47) in $\Delta$ -ZnS1 |          |                   | atom # 15 (resp. atom # 47) in $\Lambda$ -ZnS1 |          |                  |
|-----------------------------------------------|----------|-------------------|------------------------------------------------|----------|------------------|
| 15 33                                         | 0.997136 | (Ph)C-H...C(sal)  | 15 33                                          | 0.392374 | (Ph)C-H...C(sal) |
| 15 63                                         | 0.906876 | (Ph)C-H...O       | 15 63                                          | 0.267390 | (Ph)C-H...O      |
| 15 34                                         | 0.350018 | (Ph)C-H...C(sal)  | 15 34                                          | 0.256768 | (Ph)C-H...C(sal) |
| 15 40                                         | 0.302054 | (Ph)C-H...C(sal)  | 15 60                                          | 0.189046 | (Ph)C-H...Cl     |
| 15 60                                         | 0.160718 | (Ph)C-H...Cl      | 15 40                                          | 0.101225 | (Ph)C-H...C(sal) |
| 15 41                                         | 0.103609 | (Ph)C-H...C(imin) |                                                |          |                  |
| Sum                                           | 2.82     |                   | Sum                                            | 1.21     |                  |

**b)**

| atom # 1 (resp. atom # 33) in $\Delta$ -ZnS1 |          |                   | atom # 15 (resp. atom # 33) in $\Lambda$ -ZnS1 |          |                      |
|----------------------------------------------|----------|-------------------|------------------------------------------------|----------|----------------------|
| 1 47                                         | 0.996316 | (sal)C...H-C(Ph)  | 1 47                                           | 0.392874 | (sal)C...H-C(Ph)     |
| 1 46                                         | 0.445425 | (sal)C...C(Ph)    | 1 44                                           | 0.349489 | (sal)C...H-C(methin) |
| 1 59                                         | 0.345639 | (sal)C...H-C(CH3) | 1 46                                           | 0.240414 | (sal)C...C(Ph)       |



|      |          |                |      |          |                    |
|------|----------|----------------|------|----------|--------------------|
| 1 48 | 0.113776 | (sal)C...C(Ph) | 1 43 | 0.150317 | (sal)C...C(methin) |
|      |          |                | 1 45 | 0.111773 | (sal)C...C(Ph)     |
|      |          |                | 1 62 | 0.104023 | (sal)C...N         |
| Sum  | 2.82     |                | Sum  | 1.35     |                    |

c)

| atom # 14 (resp. atom # 46) in $\Delta$ -ZnS1 |          |                 | atom # 14 (resp. atom # 46) in $\Lambda$ -ZnS1 |          |                |
|-----------------------------------------------|----------|-----------------|------------------------------------------------|----------|----------------|
| 14 33                                         | 0.445102 | (Ph)C...C(sal)  | 14 33                                          | 0.240302 | (Ph)C...C(sal) |
| 14 63                                         | 0.429632 | (Ph)C...O       | 14 63                                          | 0.197005 | (Ph)C...O      |
| 14 40                                         | 0.255479 | (Ph)C...C(sal)  | 14 40                                          | 0.103307 | (Ph)C...C(sal) |
| 14 41                                         | 0.183581 | (Ph)C...C(imin) | 14 34                                          | 0.088872 | (Ph)C...C(sal) |
| 14 62                                         | 0.142815 | (Ph)C...N       |                                                |          |                |
| Sum                                           | 1.46     |                 | Sum                                            | 0.63     |                |

<sup>a</sup> Listed are the inter-atom interaction between the two ligand fragments from the 70 strongest interactions (highest IBSIW indices) in Table S5 for  $\Delta$ -ZnS1 and Table S6 for  $\Lambda$ -ZnS1. See the graphs to Table S5 and Table S6 for atom numbering.

## REFERENCES

- (1) H. D. Flack, M. Sadki, A. L. Thompson and D. J. Watkin, *Acta Crystallogr., Sect. A: Fundam. Crystallogr.*, 2011, **67**, 21.
- (2) H. D. Flack and G. Bernardinelli, *Chirality*, 2008, **20**, 681.
- (3) H. D. Flack and G. Bernardinelli, *Acta Crystallogr., Sect. A: Fundam. Crystallogr.*, 1999, **55**, 908.
- (4) H. Flack, *Acta Crystallogr., Sect. A: Fundam. Crystallogr.*, 1983, **39**, 876.
